# Spatiospectral brain networks reflective of improvisational experience

Josef Faller<sup>a,b,\*</sup>, Andrew Goldman<sup>a,c</sup>, Yida Lin<sup>a</sup>, James R. McIntosh<sup>a,d</sup>, Paul Sajda<sup>a,e</sup>

<sup>a</sup>Department of Biomedical Engineering, Columbia University, New York, NY, USA

<sup>b</sup>DEVCOM Army Research Laboratory, Aberdeen Proving Ground, MD, USA

<sup>c</sup>Jacobs School of Music, Department of Music Theory and Cognitive Science Program,  
Indiana University, Bloomington, IN, USA

<sup>d</sup>Department of Orthopedic Surgery, Columbia University, New York, NY, USA

<sup>e</sup>Data Science Institute, Columbia University, New York, NY, USA

---

## Abstract

Musical improvisers are trained to categorize certain musical structures into functional classes, which is thought to facilitate improvisation. Using a novel auditory oddball paradigm (Goldman et al., 2020) which enables us to disassociate a deviant (i.e. musical cord inversion) from a consistent functional class, we recorded scalp EEG from a group of musicians who spanned a range of improvisational and classically trained experience. Using a spatio-spectral based inter and intra network connectivity analysis, we found that improvisers showed a variety of differences in connectivity within and between large-scale cortical networks compared to classically trained musicians, as a function of deviant type. Inter-network connectivity in the alpha band, for a time window leading up to the behavioural response, was strongly linked to improvisation experience, with the default mode network acting as a hub. Spatio-spectral networks post response were substantially different between improvisers and classically trained musicians, with greater inter-network connectivity (specific to the alpha and beta bands) seen in improvisers whereas those with more classical training had largely reduced inter-network activity (mostly in the gamma band). More generally, we interpret our findings in the context of network-level correlates of expectation violation as a function of subject expertise, and we discuss how these may generalize to other and more ecologically valid scenarios.

*Keywords:* Musical Improvisation, Brain Network Connectivity, Electroencephalography (EEG), Phase Slope Index (PSI)

---

## 1. Introduction

Improvisation has received scholarly attention in recent years from a variety of disciplinary perspectives. While often associated with musical performance, improvisation is theorized to underlie a wide variety of human behaviors ranging from artistic practices to organizational management to the performance of gender (Lewis & Piekut, 2016). Following from definitions of creativity in the psychology literature, improvisation

---

\*Corresponding author

Email address: [josef.faller@gmail.com](mailto:josef.faller@gmail.com) (Josef Faller)

6 can be characterized as the spontaneous formation of novel, high quality output, that is novel and useful  
7 (Sternberg et al., 2004). Recent work has begun to coalesce knowledge and models from electroencephalogra-  
8 phy (EEG) studies (Stevens Jr & Zabelina, 2019), the involvement of the motor system (Bashwiner & Bacon,  
9 2019), the importance of expertise (Pinho et al., 2014; Braun, 2008), perception-action coupling (Loui, 2018),  
10 top-down and bottom-up networks (Faber & McIntosh, 2020), and network neuroscience (Beaty et al., 2019;  
11 Belden et al., 2020).

12 Western musical improvisation offers an important model for the more general study of improvisation.  
13 Western musical improvisers can create and play music spontaneously, guided only (if at all) by notation  
14 that does not specify exact notes, but instead specifies functional classes of harmonies and melodies with  
15 multiple possible realizations, or instantiations as notes (e.g., jazz lead sheets, or figured bass notations).

16 Improvisers are free to play any notes that fit these functional classes, subject to certain constraints, such  
17 as musical syntax, aesthetic considerations, and style or appropriateness for the audience (Berliner, 1994).  
18 Intriguingly, Western classically trained musicians, following a musical aesthetics that reifies specific series  
19 of notes as musical works (Goehr, 1992), are trained to perform these works strictly following the musical  
20 score and rarely ever improvise harmonic or melodic aspects of the music; to change those aspects would  
21 be to change the work of music, contradicting the aesthetics of the classical music tradition. Presumably as  
22 a result of the specific nature of this training, a classically trained musician who may have trained playing  
23 an instrument just as many years as an improviser - just in a different way - may not be able to improvise  
24 music.

25 Previous work found that jazz improvisers showed more pronounced, larger early right anterior negativ-  
26 ity (ERAN) to rare and unexpected targets (Przysinda et al., 2017). Magnitudes of these ERAN responses  
27 correlated with metrics for improvisation experience and P3b and ERAN correlated with fluency and orig-  
28 inality in divergent thinking tasks. Aligned with these findings Zabelina & Ganis (2018) reported that  
29 individuals with greater ability in divergent thinking showed shorter response times and a stronger N2 ERP  
30 deflection for rare target trials which the authors interpret as higher attentional flexibility and stronger  
31 engagement of cognitive control processes in divergent thinkers. Musicians with higher improvisation ex-  
32 perience were further found to show lower BOLD activation in the right motor area (inferior frontal gyrus  
33 or IFG, anterior insula), regions associated with the default mode network or DMN (angular gyrus), the  
34 dorsolateral prefrontal cortex or DLPFC (Pinho et al., 2014) and higher upper-alpha power frontally during  
35 improvisation relative to control conditions (Lopata et al., 2017). These findings are supported by studies  
36 which contrasted brain activity during musical improvisation relative to control tasks within individuals in  
37 fMRI (Limb & Braun, 2008; Bengtsson et al., 2007; de Manzano & Ullén, 2012; Liu et al., 2012; Kouneiher  
38 et al., 2009), and complemented by electro- and magnetoencephalography-based studies which, in slightly  
39 different tasks, reported increased theta, alpha and beta power (Sasaki et al., 2019), decreased theta, alpha  
40 and beta power (Adhikari et al., 2016), or increased alpha and theta, but decreased beta power (Boasen  
41 et al., 2018).

42 When studying improvisation experience in terms of differences in brain connectivity, Pinho et al. (2014)  
43 reported that individuals with more improvisation experience showed greater connectivity between DLPFC  
44 and motor regions (dorsal premotor cortex or dPMC, pre-supplementary motor area or pre-SMA) based on  
45 BOLD-based functional connectivity. Work by the same authors (Pinho et al., 2015) supported the original  
46 findings when brain connectivity was studied within-subject during improvisatory activity relative to control  
47 conditions. Work by other authors in fMRI (Dhakal et al., 2019) and EEG (Adhikari et al., 2016) on the  
48 other hand reported on evidence for decreased granger causality-based connectivity.

49 Very recent work has focused on studying connectivity between large-scale cortical networks with Belden  
50 et al. (2020) showing that musical improvisation experience can be predicted from resting state fMRI in  
51 that improvisers showed higher connectivity between primary visual network and DMN/ECN (executive  
52 control network) as well as higher connectivity between DMN and ECN while classically trained musicians  
53 on the other hand showed higher connectivity between vDMN and frontal pole. Earlier studies on creativity  
54 in non-music related contexts support these findings, reporting that creative individuals may be able to  
55 simultaneously engage large-scale networks that normally work in opposition, like default mode, salience  
56 and executive control networks (Beaty et al., 2018b). Further support comes from studies that showed that  
57 the interaction between large-scale networks predicted openness (Beaty et al., 2018a), was associated with  
58 high figural creativity (Liu et al., 2018) and may underlie the inhibition of prepotent responses (Beaty et al.,  
59 2017).

60 Goldman et al. (2020) theorized that the specific way western musical improvisers are trained to categorize  
61 notes into higher level structures like functional-harmonic classes of chords may facilitate their ability to  
62 improvise. In music theory, harmonies can be classified by their function; roughly, in a series of harmonies,  
63 various chords play the role of "tonic" harmonies, some can function as "pre-dominant harmonies" and some  
64 as "dominant harmonies," depending on their placement within syntactically ordered series of harmonies.  
65 Different chords can play these different functional roles: for example, in some musical contexts, an improviser  
66 can substitute a chord with the notes G-B-D for one with the notes Db-F-Ab; these two chords share no  
67 notes, but can serve the same dominant function. Being able to substitute one harmony for another within  
68 the same functional class constitutes an important part of widely practiced forms of improvisation, and  
69 would underlie other important skills like recognizing a bandmate's substitutions in order to more fluently  
70 respond and interact with them. Thus, in the study, the authors hypothesized that trained improvisers  
71 may perceive different chords within a functional class as more similar than chords that belong to different  
72 functional classes, whereas musicians without improvisatory training would not show the influence of such  
73 categorizations on their harmonic perception.

74 The authors tested this hypothesis in an EEG study using an auditory oddball paradigm where impro-  
75 visers and classically trained musicians listened to progressions of three chords where the middle chord was  
76 either a deviant in terms of its musical inversion, but still picked from within the same functional class,  
77 referred to as "exemplar deviant" (7.5% probability), a deviant that also lay outside the functional class,

78 referred to as "function deviant" (7.5% probability), or a standard (no change in inversion; same functional  
79 class; 85% probability). In support of their hypotheses, Goldman et al. found that musicians with more  
80 improvisation experience were slower and less accurate at detecting exemplar deviants relative to function  
81 deviants, i.e., deviant harmonic stimuli outside of the functional class were more salient than deviants within  
82 the functional class. In addition, more experienced improvisers also showed less pronounced N2c and P3b  
83 event-related potential (ERP) responses to exemplar deviants relative to function deviants, interpreted as a  
84 relatively lower violation of expectancy.

85 Here we build on the data collected by Goldman et al. (2020) to investigate whether connectivity between  
86 cortical networks could help explain how musicians perceive and process musical structures, and whether  
87 improvisatory training leads to characteristic differences in such processing. We use connectivity and band  
88 power to isolate and measure spatio-spectral brain networks and processes related to how musicians perceive  
89 chords within and across functional-harmonic categorical boundaries. We focus on whether the amount of  
90 improvisatory training can predict differences between these measurements. Again, as described by Goldman  
91 et al. (2020), this difference helps explain an important aspect of improvisatory training, perception, and  
92 performance. We focus on canonical cortical networks (Williams, 2016), some of which have been implicated  
93 in improvisation by previous studies (Belden et al., 2020), specifically networks related to attention (including  
94 frontoparietal network and dorsal attention network; e.g. Marek & Dosenbach (2018), Fornito et al. (2012)  
95 and Vossel et al. (2014)), cognitive control (e.g. Niendam et al. (2012)), salience (also including cingulo  
96 opercular network; e.g. Seeley (2019), Seeley et al. (2007) and Dosenbach et al. (2006)) and the default mode  
97 network (e.g. Fornito et al. (2012)). In an analysis inspired by Hanada et al. (2019) we derived connectivity  
98 within and between these networks as follows: We first recovered neuroelectrical source activity for every  
99 constituent region of given networks (e.g. ACC, DLPFC, etc.) using inverse methods (cortically constrained  
100 low resolution tomography; Pascual-Marqui et al. (2002)). We then computed directed connectivity between  
101 regions within and between networks using a validated signal processing pipeline (Mahjoory et al., 2017)  
102 that made use of a connectivity metric (phase slope index, PSI, Nolte et al. (2008)) that was theoretically  
103 and empirically shown (Nolte et al., 2008) to be robust to volume conduction effects as they appear in  
104 EEG (Haufe et al., 2013). These network metrics were then separately computed for exemplar and function  
105 deviants and the difference between these scalar values was used to linearly predict self-reported weekly  
106 improvisation hours, weekly hours spent training classical music and a behavioral metric (Goldman et al.,  
107 2020; Townsend & Ashby, 1978) that reflected the difference in task performance between exemplar and  
108 function deviants. We analyzed the resulting spatio-spectral networks for three time windows: 1) between  
109 presentation of the second and third chord (*between chords*), 2) prior to the response (*pre-response*) and 3)  
110 after the response (*post-response*) (see Fig. 1).

## 111 2. Materials and Methods

### 112 2.1. Study participants

113 The data for this analysis has been collected by Goldman et al. (2020): A total of 40 musicians with  
114 formal training and/or significant professional experience (mean age 25.3, s.d. 5.5; 24 male) completed the  
115 experiment, with 25 of the subjects reporting  $\geq 1$  hour/week improvisation training on average since age 18.  
116 The musicians' primary instruments were piano ( $N_p=14$ ), wind ( $N_w=15$ ) and string instruments ( $N_s=11$ ).  
117 Eight musicians reported being able to perfectly assess pitch of musical notes in absence of a reference tone  
118 ("absolute pitch", Ward (1999)). All participants reported normal hearing and no history of neurological  
119 disorders. The study was approved by the institutional review board of Columbia University (NY, USA)  
120 and all subjects provided written informed consent prior to participation in the experiments.

### 121 2.2. Auditory oddball task

122 The musicians were instructed to listen to chord progressions, that each consisted of three chords. We  
123 refer to one instance of such a progression in the recording as a trial. Every one of the three chords in one trial  
124 sounded in sequence, each for 400 ms in piano timbre, after which each trial ended with another 400 ms silence.  
125 This resulted in a fixed, total trial length of 1600 ms. The only progressions used in the experiment were  
126 ii-IV-I, ii-V-I, ii-IV6-I and ii-V6-I (this notation reflects chord configurations as shown in Figure 1A). Each  
127 experimental block consisted of 180 trials. For each such block one of the four aforementioned progressions  
128 were chosen as "standard", resulting in four types of blocks (see Goldman et al. (2020) for details). These  
129 "block types" were used to counterbalance the effect of other features of the individual progressions such  
130 as intervallic content that may have been in themselves salient (refer to Goldman et al. (2020) for further  
131 explanation). An experimental block always started with at least eight "standard" trials for the purpose of  
132 allowing participants to learn what type of progression would be the standard for the current block. There  
133 were two types of deviant trials that each occurred at a probability of 7.5% (in total 15%). Every deviant  
134 trial was followed by at least three standard trials. Deviant trials only differed from standard trials in terms  
135 of the middle chord: (1) Exemplar deviants, where the middle chord was replaced with a chord of identical  
136 notes but different inversion. For example, if the middle chord for a standard trial in that experimental  
137 block was V then the middle chord for the exemplar deviant in that block would be V6. For (2) function  
138 deviants, the middle chord was replaced by a chord from a different functional class. For example, if the  
139 middle chord for a standard was again V, then the middle chord for the corresponding function deviant in  
140 that block would be IV (again, see Figure 1A). Importantly, the key for each trial's chord progression was  
141 picked at random. This meant that musicians needed to examine the second chord of every trial relative to  
142 the first and/or third to identify whether the trial was a standard or deviant. The order of standards and  
143 deviants within every one of the four types of experimental blocks was generated once only, and was thus  
144 identical across subjects within these block types. For the experiment, every one of the block types occurred  
145 twice, thus resulting in a total of eight blocks per subject. The order of the eight blocks was shuffled for every

146 subject. In total, there were 1440 trials per subject of which 222 were functional and 218 were exemplar  
 147 deviants. See Goldman et al. (2020) for further details.

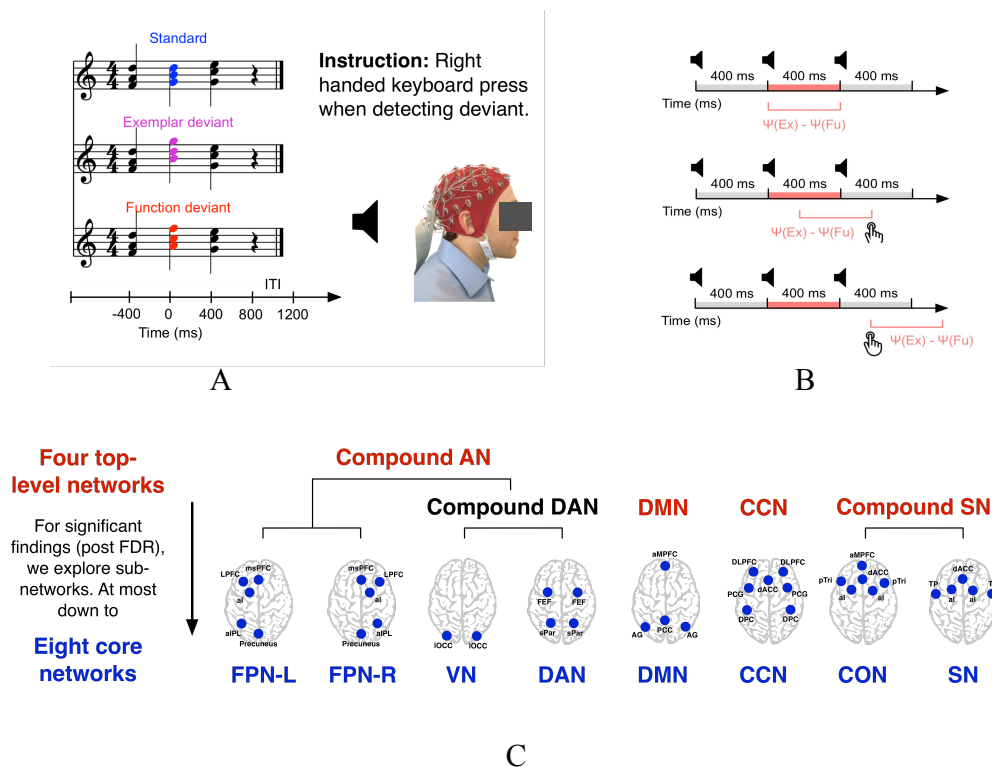

Figure 1: Experimental Paradigm. (A) Subjects (all musicians) were instructed to listen to chord progressions, each consisting of three chords, and respond with a button press if they heard a deviant. There were two types of deviants, one being "exemplar" and one "functional" (see main text for details). Each chord progression was considered a trial and EEG was recorded during the entire experiment. (B) Analysis of the data, with respect to differences in network connectivity between exemplar ( $\Psi(\text{Ex})$ ) and functional ( $\Psi(\text{Fu})$ ) deviants, was focused on three time windows, the 400 ms between the second and third chord (*between chords*), the 400 ms before the behavioural response (*pre-response*) and finally the 400 ms after the behavioural response (*post-response*). (C) The canonical brain networks investigated, both in terms of inter and inter-network connectivity, using phase-slope index measures (PSI). Networks include the left (FPN-L) and right (FPN-R) fronto-parietal network, the visual network (VN), the dorsal attention network (DAN) the default mode network (DMN) the cognitive control network (CCN) the cingulo opercular network (CON) and the salience network (SN). Three compound networks were also considered: the compound DAN, the compound SN and the compound attention network (AN). Networks were fully connected.

148 *2.3. Data collection*

149 While the musicians performed the oddball task, their EEG was recorded from 64 gel-based, active  
 150 electrodes at standard scalp locations (10/20 system; Oostenveld & Praamstra (2001)) at a sampling rate

151 of 2048 Hz using a biosignal amplifier (Biosemi ActiveTwo, Biosemi, The Netherlands). The subjects were  
152 seated comfortably at a desk inside a shielded room as the auditory oddball paradigm was played to them  
153 via noise-cancelling, in-ear headphones (Quiet Comfort 20, Bose Corp., MA, USA). Subjects were instructed  
154 to respond to deviant chords as quickly and accurately as possible, by pressing the space-bar on a computer  
155 keyboard on the desk in front of them using the index finger of their right hand. This auditory stream was  
156 also recorded as a separate channel via the biosignal amplifier to assure highly accurate synchronization of  
157 paradigm timing, EEG and behavioral responses.

#### 158 *2.4. Preprocessing*

159 Figure 2 shows an overview of the signal processing pipeline, where every participant's EEG was first  
160 filtered bi-directionally with the pass-band configured from 0.5 to 45 Hz (finite-impulse response filter; order  
161 6144, tripling the raw sampling rate). The filtered signal was then down-sampled from 2048 to 256 Hz.

#### 162 *2.5. Reconstruction of electrical activity at specific brain regions*

163 Neuroelectrical signals at specific cortical regions of interest (ROIs) in the brain, from hereon referred  
164 to as cortical current source density (CSD) signals, were inferred from the observed EEG by applying  
165 the inverse method anatomically constrained low resolution brain electromagnetic tomography (cLORETA,  
166 Pascual-Marqui et al. (2002)) to a boundary element method (BEM) based "forward model" of how current  
167 propagates from a cortical neuronal source through neural tissue, cerebrospinal fluid, skull and out to the  
168 scalp. The first step in the procedure was automatic epoch-based outlier rejection based on the Matlab  
169 toolbox EEGLAB (Delorme & Makeig, 2004), where the subject's EEG was split into epochs of 0.5 s and  
170 epochs were rejected when their signal exceeded commonly used thresholds for amplitude (smaller or greater  
171  $200 \mu V$ ), kurtosis ( $> 5.5 \times SD$  for the subject) or probability ( $> 4.0 \times SD$  for the subject). The procedure  
172 for estimating CSD was identical to García-Cordero et al. (2017), where the BEM solution was computed  
173 using OpenMEEG (Gramfort et al., 2010; Kybic et al., 2005) using the MRI based brain anatomy model  
174 "Colin 27" (Holmes et al., 1998) that was non-linearly mapped into MNI305 space (Evans et al., 1993) and  
175 associated with standard EEG electrode locations using BrainStorm (Tadel et al., 2011). Inverse modelling  
176 was accomplished through cLORETA, by which the 64 scalp EEG channels were first linearly mapped to  
177 a 5003-vertex cortical mesh and from there to 202 regions according to a sub parcellated version of the  
178 Desikan-Killiany atlas (Desikan et al., 2006).

#### 179 *2.6. Trial based outlier rejection*

180 After outlier rejection was first performed prior to source reconstruction, the obtained source space  
181 projection matrix was then applied to raw EEG signal. Prior to actual analysis of experimental trials, outlier  
182 epochs were identified separately for the three conditions of standards, function and exemplar deviants. For  
183 each condition, epochs were extracted from -400 to 1200 ms relative to the onset of the second chord in a  
184 progression and epochs were rejected according to the previously mentioned criteria for amplitude, kurtosis,

185 probability and additionally as per a custom iterative band power based method (Faller et al., 2012). For  
 186 the iterative method log-transformed band power was computed for frequency bands in delta, theta, alpha,  
 187 beta and gamma up to 50 Hz. Trials were marked as outliers if average log-transformed power for the trials  
 188 in any of the bands fell outside the mean  $\pm 4$  standard deviations of how all trials in that band and subject  
 189 were distributed. If more than 0 outlier trials were marked, then the procedure was repeated based on a  
 190 mean and standard deviation that did not take the outlier trials into account.

## 191 2.7. Connectivity estimation between brain regions

192 Conceptually, our analysis starts with four top-level brain networks (related to attention, cognitive con-  
 193 trol, default mode and salience; see Figure 1C). Some of these top-level networks (e.g. the network we  
 194 refer to as the "compound" Attention Network), are composed of sub-networks, and ultimately of eight  
 195 "core" networks (see Figure 1C). When statistically significant effects (post FDR) are observed in top-level  
 196 networks, we continue analysis in sub-networks in an effort to localize effects. Specifically in terms of com-  
 197 putation, the first step in our approach is to calculate the directed connectivity metric PSI separately for  
 198 every subject, every trial type (standards and both deviants), for every brain network (starting with the  
 199 four top-level networks), for twelve EEG frequency bands, three time windows (0 to 400 ms, relative to the  
 200 second chord, as well as -400 to 0 and 0 to 400 ms relative to the response) and for every edge within the  
 201 fully connected networks. CSD time series for the nodes in every network were obtained by averaging across  
 202 signals that corresponded to subparcellations as per the mapping from reconstructed source signals using  
 203 the Desikan-Killiany atlas (Desikan et al., 2006) as described above. A separate multivariate autoregressive  
 204 model (order 10) was then fit to these CSD time series separately for every network, every time window  
 205 and trial type using the Levinson-Wiggins-Robinson algorithm (Morf et al., 1978) as implemented in the  
 206 Biosig toolbox (Vidaurre et al., 2011) used by Fieldtrip (Oostenveld et al., 2011). Through Fourier trans-  
 207 form, we obtained cross spectral densities for the pairs of source time series for which we wanted to study  
 208 connectivity relationships (i.e. edges in the network graphs; see Fig. 1C). The phase of these cross spectral  
 209 densities was then analyzed to derive PSI (denoted as  $\Psi$ ) for the corresponding network edges according to  
 210 Nolte et al. (2008) using default parameters in Fieldtrip for EEG frequency bands  $\pm 2$  Hz relative to the  
 211 center frequencies shown in Table 1.

|                       | $\delta$ | $\theta$ | $\alpha_1$ | $\alpha_2$ | $\alpha_3$ | $\beta_1$ | $\beta_2$ | $\beta_3$ | $\beta_4$ | $\gamma_1$ | $\gamma_2$ | $\gamma_3$ |
|-----------------------|----------|----------|------------|------------|------------|-----------|-----------|-----------|-----------|------------|------------|------------|
| Center frequency (Hz) | 3        | 6        | 8          | 10         | 12         | 16        | 20        | 24        | 28        | 32         | 36         | 40         |

Table 1: Center frequencies for each band used in the PSI analysis

212 PSI makes use of the fact that if a signal in a frequency band that spans the adjacent frequencies  $f_1$  to  $f_n$   
 213 in  $x_a(t)$  is reproduced with a time delay  $\tau$  later in another signal  $x_b(t)$ , then the phase spectrum of complex  
 214 coherency is linear over this contiguous range of frequencies  $f_1$  to  $f_n$  with a positive slope proportional to



215 the time delay  $\tau$ . If signal  $x_b(t)$  instead would lead signal  $x_a(t)$  in time, then a negative slope would be  
216 observed. A more formal definition for PSI as per Nolte et al. (2008) is

$$\Psi_{k,m} = \Im \left( \sum_{f \in F} C_{k,m}^*(f) C_{k,m}(f + \delta f) \right) \quad (1)$$

217 where  $k$  and  $m$  indicate the indices of the signals between which to calculate connectivity,  $C_{k,m} =$   
218  $S_{k,m}(f) / \sqrt{S_{k,k}(f) S_{m,m}(f)}$  represents complex coherency,  $S$  the cross-spectral density matrix,  $f$  is one out  
219 of a set  $F$  of frequencies in a small band for which to calculate PSI,  $\delta f$  the frequency resolution, the asterisk  
220 denotes taking the conjugate transpose and  $\Im(\cdot)$  denotes taking the imaginary part of a complex number.

### 221 2.8. Estimation of connectivity within brain networks

222 To capture connectivity regardless of directionality across edges over a whole cortical network in a robust  
223 manner we defined a simple metric  $\Psi_{NW}$ , for which the absolute value was taken for the PSI value for  
224 every edge of a network before all these absolute values were simply averaged. More formally, and based on  
225 definitions by Nolte et al. (2008) this can be represented as

$$\Psi_{NW} = \langle |\Psi_{k,m}| \rangle \quad (2)$$

226 where  $\Psi$ , indexed by  $k$  and  $m$  represents the PSI between the brain signals  $k$  and  $m$  that correspond to  
227 pairs of nodes within the network,  $|\cdot|$  denotes taking the absolute value and  $\langle \cdot \rangle$  denotes expected value.

### 228 2.9. Estimation of connectivity between brain networks

229 Connectivity between networks was assessed by first computing PSI between the nodes of different net-  
230 works. For example, connectivity was computed between one ROI in network 1 and every ROI in network  
231 2 and so forth. Then we again took the absolute value for all these PSI results, and finally averaged across  
232 all the results. That way we obtained one scalar value reflective of overall connectivity between one pair of  
233 networks.

$$\Psi_{N1 \leftrightarrow N2} = \langle |\Psi_{N1k, N2m}| \rangle \quad (3)$$

### 234 2.10. Estimation of band power within brain networks

235 Average activity across a network as expressed in signal amplitude was captured by computing logarithm  
236 transformed bandpower for every region of interest (node) in the network and then averaging across the  
237 results for these nodes. More formally,

$$\log.BP_{NW} = \langle \log(P_k) \rangle \quad (4)$$

238 where  $P$  are the band power values, averaged across trials, for brain signals  $k$  that correspond to network  
239 constituent nodes and  $\langle \cdot \rangle$  again denotes the expected value.

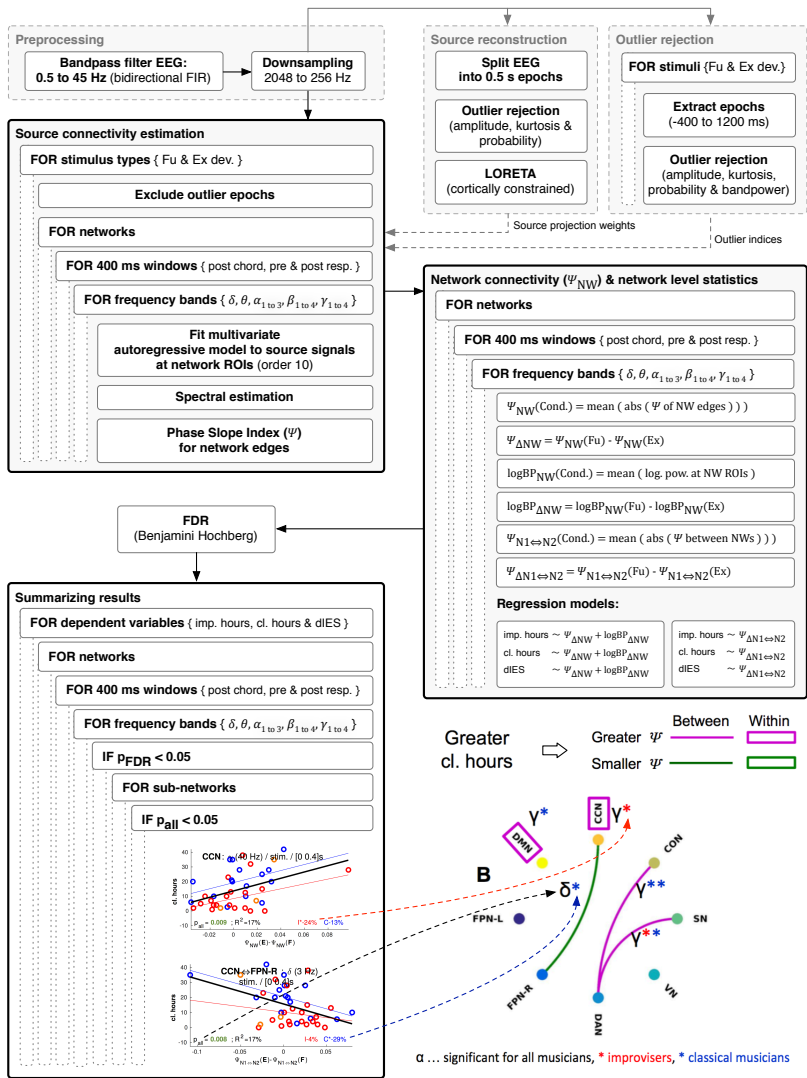

Figure 2: Flowchart summarizing data processing and analysis used in the study. Each block includes a summary of steps for the data processing and analysis that was done: EEG Preprocessing, Source reconstruction, Outlier rejection, Source connectivity estimation, Network connectivity and network level statistics and methodology for Summarizing results. The lower right figure shows how the results are presented in terms of intra and inter-network interactions. This example network analysis is for the dependent variable cl. hours, so the number of reported weekly hours spent training classical performance. Results of the PSI analysis are shown with boxes (for intra-network connectivity) and edges (inter-network connectivity) with color indicating the direction of the effect. Pink indicates that musicians with greater reported weekly hours spent training classical performance (cl. hours) also showed greater connectivity for exemplar relative to function deviants. Green on the other hand indicates lower connectivity for exemplar relative to function deviants. Each connectivity measure for a network (either box/intra or edge/inter) is associated with one or more spectral bands, indicating the frequencies at which the connectivity is significant. Black greek letters indicate significant effects (i.e.  $p < 0.05$ ) across all musicians. Colored asterisks indicate which connectivity (box/intra or edge/inter) is additionally significant for improvisers only (red \*) or classical musicians only (blue \*). One, two and three \* correspond to threshold levels for p-values of 0.05, 0.01 and 0.001. Further details are provided in the main text.

240 *2.11. Statistical prediction of experience and behavior from network connectivity*

241 Robust regression (Holland & Welsch, 1977) was used to separately predict improvisation experience  
 242 and behavioral performance in the oddball task from two independent variables that were based on overall  
 243 connectivity NW in large-scale canonical cortical networks for function and exemplar deviants. Improvisation  
 244 experience (imp. hours) was represented by average weekly hours of practice in musical improvisation since  
 245 age 18 as reported by the musicians in a questionnaire prior to the experiment, and non-improvisatory  
 246 experience (cl. hours) was represented by average weekly hours of non-improvisatory (e.g., classical-style)  
 247 practice (Goldman et al., 2020). As per the hypotheses of Goldman and colleagues, improvisers should  
 248 react more slowly and less accurately to detecting exemplar relative to function deviants, since improvisers  
 249 regularly train to substitute chords with other chords from the same functional class and standards and  
 250 exemplar deviants were from within the same functional class. This was captured in the following behavioral  
 251 metric

$$dIES = \log\left(\frac{RT_{Ex}}{Acc_{Ex}}\right) - \log\left(\frac{RT_{Fu}}{Acc_{Fu}}\right) \quad (5)$$

252 where  $RT$  and  $Acc$  represent average response time and accuracy for the respective deviant conditions  
 253 of exemplar and function deviants. A positive value of  $dIES$  corresponds to function deviants being easier  
 254 to detect, while a negative value corresponds to exemplar deviants being easier to detect. The following  
 255 regression models were thus evaluated across networks (starting with the four top-level networks; see Fig 1C),  
 256 three time windows and twelve frequency bands:

$$imp.hours \sim [\Psi_{NW}(Ex) - \Psi_{NW}(Fu)] + [\log.BP_{NW}(Ex) - \log.BP_{NW}(Fu)] \quad (6)$$

$$cl.hours \sim [\Psi_{NW}(Ex) - \Psi_{NW}(Fu)] + [\log.BP_{NW}(Ex) - \log.BP_{NW}(Fu)] \quad (7)$$

$$dIES \sim [\Psi_{NW}(Ex) - \Psi_{NW}(Fu)] + [\log.BP_{NW}(Ex) - \log.BP_{NW}(Fu)] \quad (8)$$

257

258 where expressions in  $[\cdot]$  represent one variable and the abbreviations  $Fu$ ,  $Ex$  and  $Sta$  represent the three  
 259 stimulus conditions.

$$imp.hours \sim [\Psi_{N1 \leftrightarrow N2}(Ex) - \Psi_{N1 \leftrightarrow N2}(Fu)] \quad (9)$$

$$cl.hours \sim [\Psi_{N1 \leftrightarrow N2}(Ex) - \Psi_{N1 \leftrightarrow N2}(Fu)] \quad (10)$$

$$dIES \sim [\Psi_{N1 \leftrightarrow N2}(Ex) - \Psi_{N1 \leftrightarrow N2}(Fu)] \quad (11)$$

260

261 After false-discovery rate (FDR; Benjamini & Hochberg (1995)) based correction on model level (number  
 262 of comparisons: 3 dependent variables x number of networks x 3 time windows x 12 frequencies), models  
 263 that resulted in FDR-corrected p-values  $< 0.05$  were further studied using robust regression directly on the  
 264 independent variables; on that level p-values  $< 0.05$  were considered statistically significant. Whenever we  
 265 were fitting data for improvisers alone, three improvisers were conservatively excluded since we found that

266 they, on occasion, represented overly influential data points (represented as orange instead of red circles in  
 267 scatter plots in the supplemental material).

### 268 3. Results

269 We present results in terms of the time windows of analysis, shown in Figure 1B: *between chords, pre-*  
 270 *response, post-response*. As we are discussing greater or lower connectivity, we are specifically referring  
 271 to greater connectivity for exemplar relative to function deviants (i.e.  $\psi(Ex) - \psi(Fu)$ ), consistent with  
 272 Equations (6) to (11).

#### 273 3.1. Stimulus locked analysis between chords

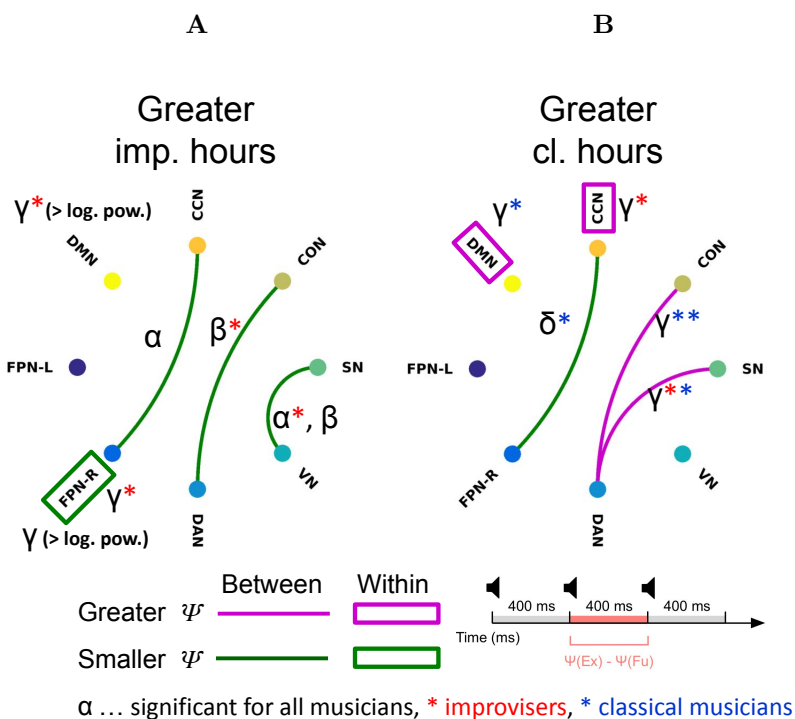

Figure 3: Spatospectral networks for between chords analysis. Bottom right shows the time window of the analysis (refer back to Fig 1B). (A) Musicians with greater improvisation experience showed lower inter-network connectivity between canonical brain networks in the alpha and beta band for the exemplar relative to the function deviant. Specifically these effects were found between cognitive control (CCN) and right frontoparietal (FRN-R) networks in the alpha band and between the cingulo opercular (CON) and dorsal attention (DAN) networks in the beta band and between salience (SN) and visual (VN) networks in the alpha and beta bands. Intra-network connectivity was lower in the FRN-P. In addition both the FRN-P and default mode network (DMN) showed greater logarithmic gamma power. (B) Greater experience performing classical music was likewise associated with lower inter-network connectivity between CCN and FPN-R, though the effect was in the delta rather than alpha band. Greater inter-network connectivity was seen between DAN and CON and DAN and SN, both in the gamma band. Increased intra-network activity was seen in both the DMN and CCN, once again specifically for the gamma band.

274 *3.1.1. Reduced connectivity between DAN and CON networks for improvisers relative to classically trained*  
275 *musicians*

276 In a time window of 400 ms directly following the onset of the audio of deviant chords, musicians with  
277 greater improvisation experience showed lower connectivity between canonical brain networks in the alpha  
278 and beta band for the exemplar relative to the function deviant (see Fig. 3A). Oposing effects between  
279 musical disciplines were observed for connectivity between cingulo opercular and dorsal attention network,  
280 where greater improvisation experience, was associated with lower connectivity in the beta band ( $p_{FDR} =$   
281  $0.036$ ,  $R^2 = 17.8\%$ ; Fig. 3A), while greater experience with classical music, in comparison, was associated with  
282 greater connectivity in the gamma band ( $p_{FDR} = 0.046$ ,  $R^2 = 15.5\%$ ; Fig. 3B). Further noteworthy effects  
283 were found when predicting improvisation experience between cognitive control and right frontoparietal  
284 network in the alpha band ( $p_{FDR} = 0.036$ ,  $R^2 = 16.8\%$ ) and finally between salience and visual network in  
285 the alpha ( $p_{FDR} = 0.044$ ,  $R^2 = 16.3\%$ ) and beta band ( $p_{FDR} = 0.017$ ,  $R^2 = 25.5\%$ ), all shown in Fig. 3A.

286 *3.1.2. Greater experience irrespective of discipline was associated with reduced connectivity between CCN*  
287 *and FPN-R*

288 In this time window directly following the audio of the chord, we further found effects within the right fron-  
289 toparietal network ( $p_{FDR} = 0.010$ ,  $R^2 = 40.8\%$ ; see Fig. 3A). Specifically, greater improvisation experience  
290 was associated with lower connectivity within the network in the gamma band ( $p = 0.013$ ,  $R^2 = 16.7\%$ ) and  
291 greater logarithmic power also in the gamma band ( $p = 0.007$ ,  $R^2 = 19.4\%$ ). Within the default mode net-  
292 work, greater improvisation experience was associated with a significant effect ( $p_{FDR} = 0.013$ ,  $R^2 = 40.8\%$ ),  
293 specifically greater logarithmic power in the gamma band ( $p = 0.006$ ,  $R^2 = 24.6\%$ ).

294 Greater experience performing classical music was likewise associated with lower connectivity between  
295 cognitive control and right frontoparietal network for exemplar relative to function deviants ( $p_{FDR} =$   
296  $0.049$ ,  $R^2 = 15.2\%$ ; Fig. 3B). However, the effect was found in the delta band whereas for improvisation  
297 experience the effect was found in the alpha band. In short, the higher the average weekly hours of ex-  
298 perience, irrespective of musical discipline, the lower the connectivity between cognitive control and right  
299 frontoparietal network for exemplar relative to function deviants (see Fig. 3A and B).

300 Greater experience in performing classical music was also associated with greater connectivity within the  
301 cognitive control ( $p_{FDR} = 0.049$ ,  $R^2 = 23.5\%$ ) and within the default mode network ( $p_{FDR} = 0.045$ ,  $R^2 =$   
302  $24.8\%$ ; Fig. 3B).

303 Furthermore, while musicians with more improvisation experience had exhibited lower connectivity be-  
304 tween salience and visual network in the alpha ( $p_{FDR} = 0.044$ ,  $R^2 = 16.3\%$ ) and beta band ( $p_{FDR} =$   
305  $0.017$ ,  $R^2 = 25.5\%$ ; Fig. 3A), musicians with greater experience in classical music showed greater connectiv-  
306 ity between salience and dorsal attention network in the gamma band ( $p_{FDR} = 0.046$ ,  $R^2 = 15.0\%$ ; Fig. 3B).

307 In this time window directly following the onset of the deviant chords, greater brain connectivity between  
308 networks for the exemplar relative to the function deviant tended to be associated with greater dIES, meaning

309 a slower and less accurate response to exemplar relative to function deviants (see Figures S.5 and S.6). We  
310 found behavioral effects for most connections where we found effects related to experience with improvisation  
311 and classical music, except between the cognitive control and right frontoparietal network. Results were less  
312 consistent for within-network effects in this time window. Specifically, it was only for the default mode  
313 network that we found a behavioral effect that also matched the finding related to self reported average  
314 weekly hours training classical music.

315 In summary, musicians who reported greater average weekly hours of training for either musical disci-  
316 pline showed lower connectivity between cognitive control and right frontoparietal network in the 400 ms  
317 following the onset of an exemplar deviant relative to the same time window for a function deviant. Between  
318 cingulo opercular and dorsal attention network, greater improvisation experience was associated with lower  
319 connectivity, while greater experience in classical music was associated with higher connectivity. Finally,  
320 improvisers exhibited lower connectivity between salience and visual network, while musicians with greater  
321 classical experience showed greater connectivity between salience and dorsal attention network.

### 322 *3.2. Pre-response analysis: Improvisers show distinctive inter-network connectivity in the alpha band with* 323 *robust effects between DMN and VN*

324 In the 400 ms before the motor response to an exemplar deviant chord - a chord that was experimentally  
325 manipulated to fall in the same functional class as the standard, but was otherwise like the function deviant  
326 chord - musicians with greater improvisation experience showed greater connectivity between brain networks,  
327 all relative to when the musicians responded to a function deviant and exclusively in the alpha band (see  
328 Fig. 4).

329 The default mode network acted as a hub with greater connectivity to the left frontoparietal, cognitive  
330 control, dorsal attention and visual network. The effect between default mode and visual network stood out  
331 as it was not only significant for all musicians (10 Hz:  $p_{FDR} = 0.042$ ,  $R^2 = 17.4\%$ ; 12 Hz:  $p_{FDR} = 0.016$ ,  $R^2 =$   
332  $24.8\%$ ; Fig 4A) but also for the smaller subset of "improvisers" alone (i.e. only musicians with self-reported  
333 average weekly hours spent improvising  $> 0.5$ ), where the effect was most robust for a center frequency of  
334 12 hz ( $p = 0.008$ ,  $R^2 = 42.4\%$ ), followed by a center frequency of 10 Hz ( $p = 0.050$ ,  $R^2 = 25.8\%$ ). Notably,  
335 musicians with more improvisation experience also showed greater connectivity between the cognitive control  
336 and the right frontoparietal network ( $p = 0.003$ ,  $R^2 = 22.0\%$ ; Fig. 4A).

337 We also identified a group of three fully interconnected networks (i.e. a "clique" or "rich club" from  
338 a graph-theoretical perspective; Griffa & Van den Heuvel (2018)) that was composed of the default mode,  
339 cognitive control and dorsal attention network. Interestingly, when studying how between network connec-  
340 tivity related to musicians' experience with classical music we observed the same sub structure such that  
341 musicians with greater self reported average weekly hours of practice in classical music since age 18 showed  
342 greater connectivity between default mode, cognitive control and dorsal attention network, so just like for  
343 improvisation experience - except in the beta rather than alpha band (see Fig. 4A and B).

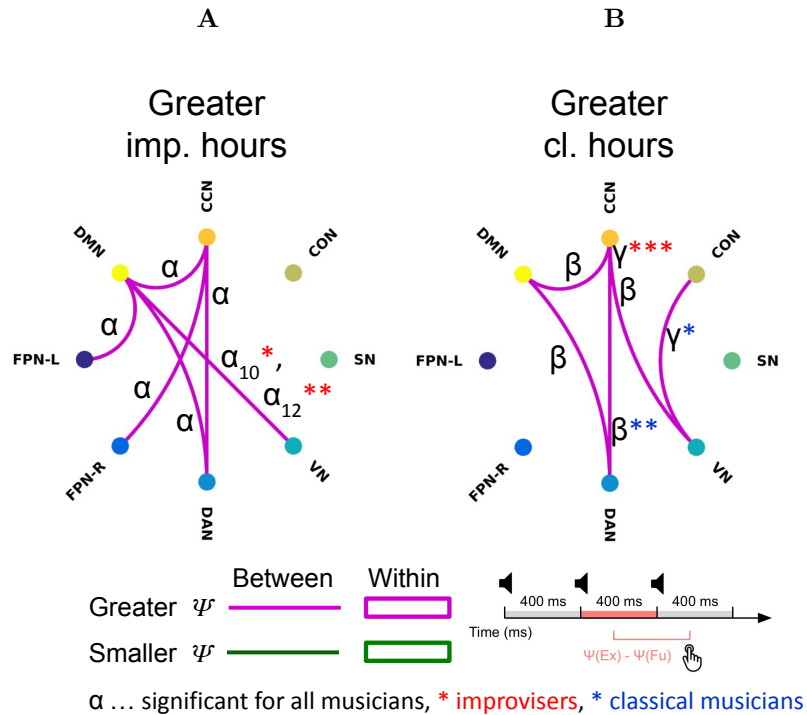

Figure 4: Spatospectral networks for pre-response analysis. Bottom right shows the time window of the analysis (refer back to Fig 1B). (A) Musicians with greater improvisation experience showed greater inter-network connectivity between a number of canonical brain networks in the alpha band for the exemplar relative to the function deviant. In this case the default mode network (DMN) acted as a "hub". (B) Greater experience performing classical music was likewise associated with greater inter-network connectivity between a number of the canonical networks, though this effect was found in the beta and gamma bands. There were no significant intra-network connectivity changes seen for either (A) or (B).

344 Furthermore, in terms of associations with experience in classical music, we found no effect between  
 345 default mode and visual network, but instead musicians with greater self-reported experience in clas-  
 346 sical music showed greater connectivity between the cognitive control and visual network in the beta  
 347 ( $p_{FDR} = 0.048, R^2 = 14.6\%$ ; Fig. 4B) and particularly the gamma band ( $p_{FDR} = 0.021, R^2 = 23.6\%$ ;  
 348 Fig. 4B). Interestingly, the latter effect was particularly robust for the sub group of improvisers alone  
 349 ( $p = 5.89e^{-4}, R^2 = 51.1\%$ ).

350 Statistically significant associations between task performance (*dIES*) and inter-network connectivity  
 351 were found broadly in the alpha, beta and gamma band as well as less often (< 5 times) in the delta and  
 352 theta band (see Fig. S.8). In almost all cases the association was such that greater connectivity between  
 353 networks was associated with greater *dIES*, meaning a slower and less accurate response for exemplar  
 354 relative to function deviants. Only less than five cases showed an effect in the opposite direction.

355 Importantly, for all effects found for improvisation experience (i.e. self-reported hours of improvisation  
 356 experience), except between default mode and dorsal attention network, we found effects for task performance  
 357 that matched in timing, frequency and direction of the effect (see Fig. S.8). This means that connectivity

358 between these networks was not only directly proportional to self reported improvisation experience, but  
359 also directly proportional to slower and less accurate responding to exemplar deviants, thus supporting the  
360 hypothesized link between inter-network connectivity, improvisation experience and modified behavior.

361 In summary, in the 400 ms before responding to a deviant chord that was experimentally manipulated  
362 to fall in the same functional class as the standard chord in an oddball task, musicians who reported  
363 greater improvisation experience showed greater connectivity between canonical cortical brain networks in  
364 the alpha band with the default mode network acting as a hub and particularly robust effects found between  
365 default mode and visual network. Greater experience in classical music was likewise associated with greater  
366 inter-network connectivity, however consistently in the beta and gamma as opposed to the alpha band. Inter-  
367 network connectivity effects between three networks, default mode, cognitive control and dorsal attention  
368 network overlapped between musical disciplines. Greater inter-network connectivity that was observed with  
369 greater improvisation experience, was consistently also associated with slower and less accurate responding to  
370 the manipulated exemplar deviant relative to the function deviant supporting the hypothesized link between  
371 improvisation experience and slower and less accurate responding to audio of chords that improvisers are  
372 trained to categorize differently (Goldman et al., 2020).

373 *3.3. Post-response analysis: For improvisers DAN and VN acted as network hubs whereas for classically*  
374 *trained musicians, CCN acted as a hub*

375 In the 400 ms after responding to an exemplar as compared to a function deviant, improvisers with greater  
376 improvisation experience tended to exhibit greater connectivity between networks with the dorsal attention  
377 and visual network acting as hubs (Fig. 5A), all mainly in the beta and gamma band, while they showed  
378 lower connectivity between the default mode and visual network ( $p_{FDR} = 0.034$ ,  $R^2 = 18.6\%$ ).

379 Meanwhile, the effects observed for musicians with greater experience in classical music tended to point in  
380 the opposite direction such that greater experience was associated with lower connectivity between networks  
381 where the cognitive control and visual network acted as hubs (Fig. 5B). Musicians with greater experience  
382 in classical music also exhibited greater connectivity between default mode and visual network, so again the  
383 opposite of what was found for improvisation experience.

384 While connectivity from the cognitive control network to other networks was lower for greater self reported  
385 experience with classical music (Fig. 5B), we also found significant effects within the cognitive control network  
386 ( $p_{FDR} = 0.035$ ,  $R^2 = 26.8\%$ ), specifically lower within network connectivity ( $p = 0.032$ ,  $R^2 = 23.2\%$ ) and  
387 lower logarithmic bandpower ( $p = 0.024$ ,  $R^2 = 13.0\%$ ) in the gamma band.

388 For this time window directly following the motor response, we further found that greater musical exper-  
389 tise was associated with greater connectivity between the salience and visual network both for improvisation  
390 (beta:  $p_{FDR} = 0.034$ ,  $R^2 = 18.4\%$ ; gamma:  $p_{FDR} = 0.016$ ,  $R^2 = 26.9\%$ ; Fig. 5A) and classical performance  
391 ( $p_{FDR} = 0.050$ ,  $R^2 = 14.5\%$ ; Fig. 5B).

392 Behavioral effects in this time window between default mode and visual network as well as between the  
393 salience and visual network and more broadly were such that greater connectivity for exemplar relative to



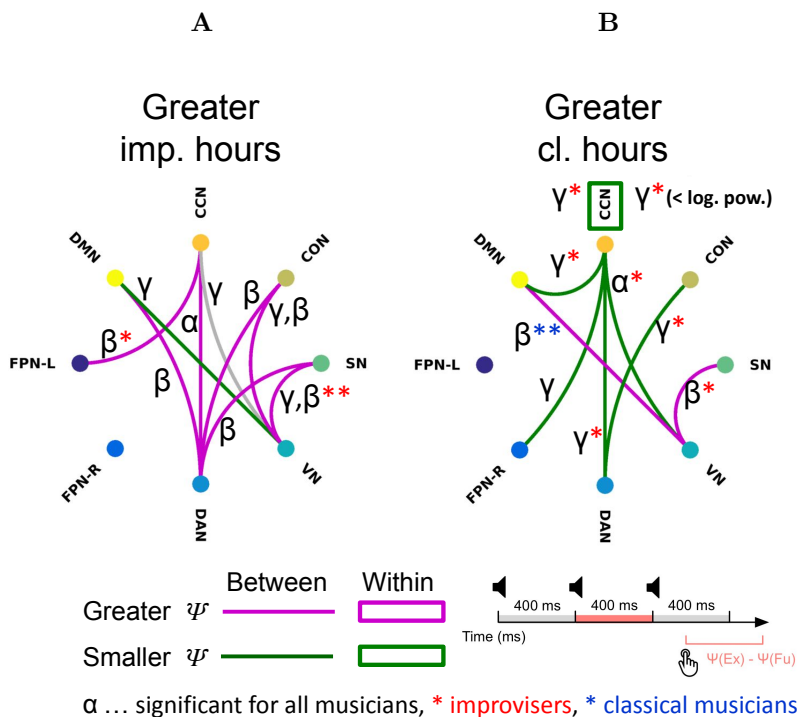

Figure 5: Spatospectral networks for post-response analysis. Bottom right shows the time window of the analysis (refer back to Fig 1B). (A) Musicians with greater improvisation experience showed greater inter-network connectivity (for the exemplar relative to the function deviant) with the dorsal attention (DAN) and visual (VN) networks acting as hubs. This inter-network connectivity was mainly in the beta and gamma band. The grey link between the cognitive control network (CCN) and VN indicates a rare case where two frequency bands ( $\gamma_1$  and  $\gamma_3$ ) within the gamma range show an effect in opposing directions. (B) We observed an opposite effect for musicians with greater experience performing classical music, namely lower inter-network connectivity, with the CCN and VN acting as hubs. Also observed was lower intra-network connectivity in the CCN and reduced low power in the CCN, both in the gamma band.

394 function deviants was associated with slower and less accurate responses to exemplar relative to function  
 395 deviants. Hypothetically, slower and less accurate responses to exemplar relative to function deviants are  
 396 linked to the training improvisers receive, so that we assumed a musician who responds slower and less  
 397 accurately to an exemplar deviant may have received more training in improvisation. For the connection  
 398 between default mode and visual network we observe that lower connectivity for exemplar relative to function  
 399 deviants was associated with greater improvisation experience, which constitutes a disagreement (Fig. 5A).  
 400 For the connection between salience and visual network as well as more broadly for other effects related to  
 401 improvisation experience in this time window we tended to find agreement.

402 In summary, for the 400 ms following motor response to the experimentally manipulated exemplar deviant  
 403 as compared to a function deviant, we found that improvisers showed lower connectivity between default  
 404 mode and visual network, greater connectivity between salience and visual network as well as an overall  
 405 increased connectivity between networks, where the dorsal attention, the visual network and to a lesser  
 406 degree the cognitive control network acted as hubs. Greater experience in classical performance training

407 was likewise associated with greater connectivity between salience and visual network, but also with greater  
408 connectivity between default mode and visual network as well as lower connectivity widely between networks  
409 where the cognitive control network acted as a hub. Within the cognitive control network, both connectivity  
410 and logarithmic power in the gamma band were lower for musicians with greater experience in training  
411 classical performance.

#### 412 4. Discussion

413 Leveraging the high temporal resolution of EEG (Rosen et al., 2020; Zabelina & Ganis, 2018; Marek  
414 & Dosenbach, 2018), and through our focus on network connectivity guided by fMRI findings, (Belden  
415 et al., 2020; Beaty et al., 2018b; Pinho et al., 2014), we asked what networked neural processes, if any, may  
416 underlie how improvisers perceive and process chords differently, given their training to think about harmony  
417 categorically (Goldman et al., 2020). We took into account activity that manifests as average EEG band  
418 power across a network as well as connectivity within or between large-scale cortical networks (Cohen &  
419 D’Esposito, 2016).

420 The exemplar deviant chord in the oddball task in this experiment was designed to be part of the same  
421 functional class as the frequent and expected standard chord, while the function deviant was equivalent  
422 to the exemplar deviant, except that the function deviant belonged to a functional class other than the  
423 standard. Improvisers are trained to substitute chords within a functional class, and thus we hypothesized  
424 that improvisers would categorize the exemplar deviant as being more similar to the standard, which we  
425 assumed should cause improvisers to respond slower and less accurately to exemplar relative to the function  
426 deviants. This idea is supported empirically also by findings by Goldman et al. (2020), who reported a  
427 statistically significant relationship such that greater *dIES* corresponded to greater self-reported weekly  
428 hours of improvisation training since age 18.

429 In our purely auditory task, musicians responded with their right hand to chords that were deviants in  
430 terms of chord inversion, but musicians were successfully kept blind (as verified by post-experiment inter-  
431 views) to the fact that there were two types of deviants and that one of these types, referred to as exemplar  
432 deviant, was modified such that it fell within the same functional class as the standard chord (Goldman  
433 et al., 2020). Improvisers are trained to categorize chords within the same functional class separately, as  
434 being usable interchangeably in improvisatory performance. We studied neural responses surrounding ex-  
435 emplar deviants but specifically after subtracting the response for function deviants, such that we could  
436 expect that any effects we observe should be specifically tied to our experimental manipulation related to  
437 categorization of musical structures.

438 One finding that stood out was that connectivity related effects between networks before improvisers  
439 responded to an exemplar relative to a deviant chord were consistently and exclusively found in the alpha  
440 band. In contrast, connectivity related effects associated with experience in classical music before the

441 response were only found in the beta and gamma band. It's noteworthy that significant findings in the alpha  
442 band were otherwise rare and most findings were either in the beta or gamma band.

443 To our knowledge this is the first report indicating that improvisers may exhibit greater between network  
444 connectivity specifically in the alpha band even by just responding to a rare chord that was manipulated to fall  
445 in the same functional class as the standard chord in an oddball task. In fact we are not aware of any report  
446 on connectivity between networks in improvisers in any brain-state occurring primarily in the alpha band.  
447 Finding an alpha related effect for improvisers in the connectivity between networks is not implausible though,  
448 given that there is ample evidence implicating the alpha oscillation in musical improvisation with reports of  
449 both increased (Sasaki et al., 2019; Boasen et al., 2018) or decreased (Adhikari et al., 2016) alpha power while  
450 musicians improvise in slightly different experiments. Beyond musical improvisation, amplitude changes in  
451 the alpha oscillation have been robustly linked to domain general creativity as measured for example by  
452 divergent thinking tasks (Zabelina & Ganis, 2018; Fink et al., 2007; Jauk et al., 2012; Schwab et al., 2014)  
453 or compound remote associates tasks (Rothmaler et al., 2017), with a relatively high heterogeneity in the  
454 direction of effects (Dietrich & Kanso, 2010; Arden et al., 2010) ascribed to the diversity in tasks and methods  
455 (Fink et al., 2014), but with findings overall leaning toward increased frontal and parietal alpha power for  
456 greater creativity (Dietrich & Kanso, 2010), where one interpretation pointed toward a hypothetical function  
457 of alpha in attenuating top-down control (Lustenberger et al., 2015). Given however, that our results are  
458 based on connectivity between brain regions rather than amplitude at certain regions, we think what we  
459 observe may be most consistent with changes in network organization and/or function that may be caused by  
460 intense training in musical improvisation. Results from graph-analyses based on fMRI (Belden et al., 2020)  
461 and EEG (N=4; Wan et al. (2014)) point to greater global network integration for improvisers as opposed  
462 to a more densely connected local organization for musicians with greater training in classical music. These  
463 findings in turn are consistent with the idea that improvisers may, through training, become very efficient  
464 at flexibly engaging and balancing a variety of mental processes with substrates in distributed brain regions  
465 (de Manzano & Ullén, 2012) related to executive control and accessing long-term/working memory in real-  
466 time (Lopata et al., 2017; Belden et al., 2020) without the necessity of conscious mediation (Limb & Braun,  
467 2008; Liu et al., 2012). Our findings of effects of inter-network connectivity in the alpha band for improvisers  
468 in contrast with effects in higher frequency bands for classically trained musicians, support the idea that long  
469 range oscillatory communication may be an important factor in creative cognition (Stevens Jr & Zabelina,  
470 2019). According to this idea, also referenced by Boasen et al. (2018), different EEG frequency bands are  
471 thought to be linked to different scales of cortical integration (Von Stein & Sarnthein, 2000) such that high  
472 frequency oscillations represent local communication while theta and alpha oscillations are linked to long-  
473 range/inter-areal integration (Haegens et al., 2010; Klimesch et al., 2007; Clayton et al., 2015). In summary,  
474 we interpret the observed effects in the alpha band for improvisers to indicate that even when improvisers  
475 merely respond to an "in-class" chord (a chord in the same functional class as the standard) they co-engage  
476 cortical resources more broadly than classically trained musicians or musicians with less extensive training in

477 improvisation. This supports the idea that music genre specific training may be accompanied by significant  
478 genre-specific changes in neurophysiology (Loui, 2018; Bianco et al., 2017) and the outcome of our experiment  
479 indicates that this may extend to how improvisers categorize musical structures.

480 Also leading up to the right handed response, we observed that greater reported weekly hours, irrespective  
481 of type of training were associated with greater connectivity between a group of three fully connected networks  
482 (a "clique" or "rich-club" in terms of graph theory; Griffa & Van den Heuvel (2018)) consisting of default  
483 mode, cognitive control and dorsal attention network was found for both disciplines, which we interpret to  
484 mean that connectivity between these networks is task related and linked to training in musical performance  
485 in general (Loui, 2018; Bianco et al., 2017), irrespective of discipline. We consider the existence of such  
486 an effect plausible and potentially scientifically interesting by itself. Given how improvisers and classically  
487 trained musicians are different groups with relatively little overlap in this sample of musicians, this finding  
488 might also be interpretable as evidence in support of the fidelity of this method.

489 Given that our focus lies on neurophysiological differences specific to improvisation we direct our attention  
490 to effects outside this clique of networks leading up to the manual response. Another effect that stood out  
491 in that time window was that improvisers showed greater connectivity between default mode and visual  
492 network leading up to the response, but less connectivity between these two networks after the response.  
493 Classically trained musicians also showed greater connectivity between default mode and visual network,  
494 however only after the response.

495 Activity in the default mode and other large-scale cortical networks including the dorsal attention network  
496 has typically been found to be anti-correlated in fMRI studies (Fornito et al., 2012). Finding increased  
497 connectivity between these networks here is consistent with the idea that creativity may depend on the  
498 flexible engagement of generative and evaluative processes (Sowden et al., 2015; Zabelina & Robinson, 2010)  
499 and aligns with reports in fMRI literature, where positively correlated engagement of large-scale cortical  
500 networks was linked to experience in musical improvisation (Belden et al., 2020), greater creativity (Beaty  
501 et al., 2018b, 2019) or openness to experience (Beaty et al., 2017).

502 The default mode network specifically, is traditionally associated with self-referential processing (Kim &  
503 Johnson, 2014), but as outlined by Belden et al. (2020) also with musical behaviors like tracking of musical  
504 tonality (Janata et al., 2002), associating music with autobiographical memories (Janata, 2009) or aesthetic  
505 response to episodic memory retrieval (Schacter & Addis, 2007). Specifically, the DMN's role in memory  
506 retrieval as part of a greater role in creative cognition (Benedek et al., 2014) may be of particular interest  
507 for this investigation. Overall, a number of studies have linked default mode network activity (Beaty et al.,  
508 2015; Rosen et al., 2017) and interaction between default mode and other networks such as the frontoparietal  
509 network (Beaty et al., 2018b, 2019; Belden et al., 2020) to creativity and musical improvisation.

510 Occipital areas that overlap what we defined here as visual network on the other hand, have been  
511 previously implicated in creativity, as reviewed by Belden et al. (2020), where greater white (Takeuchi  
512 et al., 2017) or grey (Fink et al., 2014) matter density in the occipital lobe, as well as greater white matter

513 connectivity in the inferior occipitofrontal fasciculus (Zamm et al., 2013) were found to be associated with  
514 greater creativity. Belden et al. (2020) also found greater connectivity between the visual network and the  
515 default mode as well as a network similar to what we here defined as the frontoparietal network (Belden  
516 referred to it as executive control network), in resting-state recordings of musicians with improvisation  
517 experience. Belden et al. contrasted their findings to Beaty et al. (2018b) who had found no evidence for  
518 involvement of occipital regions in a network linked to creativity in resting-state fMRI.

519 Given the findings of Belden et al. (2020) we assume that there may exist a baseline effect between  
520 default mode and visual network at rest for improvisers. However, since that should be present for function  
521 deviants as well, for which we correct by subtracting the signal acquired for function deviants, we assume  
522 that the observed effect is in fact tied to our experimental manipulation related to categorization of musi-  
523 cal structures. One explanation for the observed effects could be that connectivity between default mode  
524 and visual network reflects an access to long-term memory that is engaged only or stronger for "in-class"  
525 chords and supports how improvisers categorize musical structures according to functional classes, maybe  
526 here concretely by supporting the comparison of categories between the standard chord in working memory  
527 and categorization related information about the just perceived exemplar deviant from long-term memory.  
528 However, the fact that classically trained musicians or less extensively trained improvisers show greater  
529 connectivity between default mode and visual network as well, but post-response, indicates that this cate-  
530 gorization related phenomenon may not by itself necessarily exclusively subserve creative demands reserved  
531 only for improvisers. Instead, a more plausible explanation could be that strongly trained improvisers adapt,  
532 through training, to prioritize this process to a degree where it is executed before the manual response since  
533 an improviser's response in an ecologically valid setting may have to strongly depend on the result of this  
534 process. In other words, as per this theory, as a musician improvises they may permanently check that the  
535 chord they just heard (or played) is a constituent of the currently appropriate functional class and/or need  
536 to make sure the chord they are playing next is likewise part of that or whatever next appropriate functional  
537 class. Somebody who is not a strongly trained improviser may not or less strongly engage this process before  
538 a response to an "in-class" chord.

539 For improvisers we further observed greater connectivity between default mode and left frontoparietal  
540 network, which aligns with previous accounts that implicated these networks (Bashwiler et al., 2016; Mok,  
541 2014; Shi et al., 2018) and in particular increases in connectivity between them (Kenett et al., 2018) in  
542 supporting creative cognition (Belden et al., 2020) and high creative ability (Zabelina & Robinson, 2010).  
543 One idea is that these networks may represent cortical hubs that underlie the dual-process model of creative  
544 cognition (Sowden et al., 2015; Stanovich, 1999; Evans, 2008, 2009) with the default mode network sup-  
545 porting creative processes and the frontoparietal network, which includes lateral prefrontal brain areas like  
546 the dorsolateral prefrontal cortex, dorsal premotor cortex and inferior frontal gyrus, supporting evaluative  
547 processes (Belden et al., 2020). Given that this time window leads up to a right handed response, we think  
548 that this effect could be related to motor planning, which would imply that when improvisers are merely

549 asked to respond to an "in-class" chord, they co-engage the default mode network pointing toward a context  
550 of this motor response that is biased toward creativity. Assuming a more ecologically valid context, this tight  
551 integration with the default mode network could enable a more direct and flexible access to musical structures  
552 and motor patterns which would seem conducive to greater mastery in musical improvisation. Post response,  
553 improvisers exhibited greater connectivity between the cognitive control and the left frontoparietal network  
554 which may be reflective of evaluative processes. The fact that we found no effects for the left frontoparietal  
555 network in association with classical training, supports the idea that the left frontoparietal network plays a  
556 particular role for improvisers here in this experiment and potentially more generally in more ecologically  
557 valid contexts.

558 In the same time window leading up to the right handed response, improvisers further showed greater  
559 connectivity between the cognitive control and the right frontoparietal network.

560 The cognitive control network is thought to be a superordinate network that supports executive control  
561 functions (Cole & Schneider, 2007; Niendam et al., 2012). As Cole and Schneider explain, this may include  
562 vigilance or sustained attention (Pennington & Ozonoff, 1996; Smith & Jonides, 1999), initiation of complex  
563 goal-directed behaviors (Lezak, 1995), inhibition of prepotent but incorrect responses (Smith & Jonides,  
564 1999; Luna et al., 2010), flexibility to shift easily between goal states (Ravizza & Carter, 2008), planning  
565 necessary steps to achieve goal (Smith & Jonides, 1999) and the ability to hold information in working  
566 memory and to manipulate the information to guide response selection (Goldman-Rakic, 1996).

567 Since at this point in the trial, improvisers have not yet performed a motor action, it does not seem  
568 plausible that this phenomenon is related to an evaluative process in accordance with the dual-process  
569 model of creative cognition, even though cognitive control structures are involved. Thus it seems more likely  
570 that this phenomenon, which at this time point is specific to improvisers is also related to motor planning.

571 After the manual response, improvisers showed greater connectivity between networks with the dorsal  
572 attention and visual network acting as hubs and consistent effects were being also observed between salience  
573 and dorsal attention related networks.

574 The function of the dorsal attention network has been described as mediating top-down guided voluntary  
575 allocation of (primarily visual) attention to locations or features (Vossel et al., 2014) or the endogenous  
576 deployment of attention (Corbetta & Shulman, 2002), while Marek & Dosenbach (2018) suggest it may play  
577 a more general role in adaptive task control. The dorsal attention network has been found to be activated  
578 during voluntary attention shifts during search for salient visual stimuli (Shulman et al., 2003) and more  
579 recent findings indicate that the dorsal attention network may also play a role in external attention, either  
580 independently or in task-dependent interaction with the ventral attention network (Ahrens et al., 2019). The  
581 ventral attention network has been associated with (exogenous) re-orienting towards task-relevant events that  
582 appear at unexpected locations (Ahrens et al., 2019; Corbetta & Shulman, 2002). In experimental design,  
583 predictive (symbolic) cues are usually used to engage endogenous attention, as opposed to transient/non-  
584 predictive events to test exogenous attention (Ahrens et al., 2019).

585 One potential explanation of the observed effects around the dorsal attention network could be that  
586 for improvisers, a situation where the musician merely responds to an "in-class" chord triggers increased  
587 deployment of endogenous attention. To an improviser an "in-class" chord, particularly in the context of this  
588 experiment (where such chords are rare) but maybe more generally even during performance could represent  
589 something akin to a predictive cue. The increased engagement of endogenous attention could be linked to  
590 processes that are vital for successful improvisation. For example, what is the harmony or functional class  
591 of this chord I just heard and what is a suitable, adaptive response right now (i.e. for pressing the button in  
592 the experiment or playing the next tone or chord during performance). Major parts of the dorsal attention  
593 network also overlap the right parietal areas where Rosen et al. (2020) found greater power to be associated  
594 with greater improvisation experience. As potential explanations these authors referenced processes related  
595 to multimodal sensory processing and integration (Mihaly, 1996), long-term memory access (Wagner et al.,  
596 2005) or spatial coding, sensory-motor transformation and attention (Kaas & Stepniewska, 2016).

597 Musicians with greater experience in classical performance, but particularly those who were also impro-  
598 visers consistently showed effects indicating decreased engagement and integration of the cognitive control  
599 network, specifically, lower connectivity and logarithmic power within the cognitive control network as well  
600 as lower connectivity between the cognitive control network and other networks like default mode, right fron-  
601 toparietal, dorsal attention and visual network. This also means, that improvisers with particularly little  
602 experience in training classical music showed particularly high reliance on and integration of the cognitive  
603 control network after the manual response. This is for the most part consistent with what we find in terms  
604 of significant effects related to improvisation experience.

605 What we observe here may be an interaction effect between training in improvisation and classical music,  
606 such that improvisers with particularly little experience in training classical music require greater engagement  
607 of the cognitive control network to determine whether the response was accurate. One possible explanation  
608 for why this could be the case, could be that improvisers more so than classically trained musicians engage  
609 cognitive control resources after the response as an evaluative behavior consistent with the dual-process  
610 theory of cognition toward creative behavior (Belden et al., 2020; Sowden et al., 2015). According to this  
611 idea creative behaviors may be implemented by alternating between generative and evaluative behaviors  
612 (Belden et al., 2020). These generative behaviors are thought to be spontaneous and intuitive (Belden et al.,  
613 2020) and referred to more formally as system 1 (Stanovich, 1999) or type 1 (Evans, 2008, 2009) processes.  
614 Evaluative behaviors on the other hand are thought to be related to deliberate and analytical processing and  
615 referred to more formally as system 2 (Stanovich, 1999) or type 2 processes (Evans, 2008, 2009). Improvisers  
616 are strongly conditioned to engage evaluative processes after actions. Classically trained musicians on the  
617 other hand, usually already know exactly what they are going to play. This makes it less important for  
618 classically trained musicians to evaluate the output they just generated.

619 Among the earliest effects, directly following the onset of the exemplar deviant chord, improvisers showed  
620 greater power in the default mode network, while classically trained musicians showed greater connectivity

621 within the default mode network. This could be indicative of processes related to early memory retrieval,  
622 that are engaged more intensively the more intensely the musicians has been trained irrespective of disci-  
623 pline. Greater connectivity within network for classically trained musicians aligns with previous findings of  
624 greater local efficiency for classically trained musicians (Belden et al., 2020), while greater gamma power for  
625 improvisers could be a result of greater cortical thickness in areas of the default mode network which has  
626 been found for musical improvisers (Kühn et al., 2014).

627 Musicians who trained more extensively, irrespective of musical domain further showed lower connectivity  
628 between cognitive control and right frontoparietal network, with improvisers also showing lower connectivity  
629 but greater power in gamma within the frontoparietal network and classically trained musicians showing  
630 greater connectivity within the cognitive control network. Taken together these findings point to a difference  
631 in executive control processes between the types of musical disciplines when faced with an exemplar deviant.  
632 While classically trained musicians seem to more strongly engage cognitive control resources, again exhibiting  
633 stronger within-network connectivity suggestive of high local efficiency (Belden et al., 2020), improvisers in  
634 contrast, showed lower connectivity and again greater power within the right frontoparietal network, which  
635 could be linked to more globally connected cortical organization (Belden et al., 2020).

636 Another difference between the two types of training directly after perceiving an exemplar deviant, may  
637 lie in how salience related networks configure dorsal attention related networks, with improvisers showing  
638 less connectivity between cingulo opercular and dorsal attention network as well as between the salience  
639 and visual network. Classically trained musicians on the other hand showed greater connectivity between  
640 dorsal attention and both cingulo opercular and the salience network. In accordance with our hypothesis  
641 (Goldman et al., 2020), this could be interpreted as improvisers perceiving the exemplar deviant as more  
642 similar to the standard since both chords are constituents of the same functional class. For more extensively  
643 trained classical musicians on the other hand, their training may make them more sensitive to the subtle  
644 difference between exemplar and function deviant, which in turn leads salience related networks to more  
645 strongly engage processes related to endogenous attention.

646 Interpreting the involvement of the visual network should take into account that musicians in this exper-  
647 iment were performing a target detection task, for which Mantini et al. (2009) showed, based on simultane-  
648 ously recorded EEG and BOLD data, that activity in the dorsal and ventral attention network correlated  
649 significantly with the P300 reference time course and thus was interpreted to best account for sustained  
650 and transient activity in a visual oddball task. Thus one could consider as an alternative explanation that  
651 improvisers may have been merely more surprised for the exemplar, relative to the function deviant for an  
652 unknown reason other than our manipulation related to categorization of musical structures. But this would  
653 not explain the increased connectivity between default mode and visual network. On the contrary, connec-  
654 tivity between cortical networks, particularly also including the default mode network has been robustly  
655 linked to improvisation, particularly at rest (Belden et al., 2020).

656 Behavioral effects were mostly found in the alpha, beta and gamma band and were more numerous than



657 effects related to either of the two types of musical expertise. Apart from very few exceptions the nature  
658 of associations was such that greater connectivity between or within the networks was associated with  
659 slower and less accurate responding to exemplar relative to function deviants. Overall this is in line with  
660 previous work that also observed links between behavioral performance and connectivity within and between  
661 brain networks as reviewed by Cohen (2018). One hypothesis for this experiment was that improvisers  
662 would respond slower and less accurately for exemplar relative to function deviants. This holds, in that  
663 we found effects in behavior that matched - in time, frequency and direction - those effects that were  
664 most convincingly tied to improvisation expertise. However, we also found behavioral effects that matched  
665 effects related to expertise in classical music, supporting the idea that more intense training in the classical  
666 domain, may as well decrease task performance for exemplar deviants, likely for reasons different from those  
667 found in improvisers. In addition we found behavioral effects for which we found no corresponding effects  
668 for training in improvisation or classical music, which could mean that these behavioral effects capture  
669 phenomena unrelated to musical expertise, or that there is a matching effect related to musical expertise,  
670 but that self-reporting is too noisy to establish a significant effect. Any other mismatch between effects  
671 found for behavior and self-reported experience could be a result of behavioral effects being strongly tied  
672 to motor-related brain activity, while effects for self-reported experience may be more strongly related to  
673 cognitive aspects. In summary, given that our experimental manipulation strongly narrows resulting effects  
674 for exemplar relative to function deviants to categorization of musical structures, and that we find behavioral  
675 effects that match the effects that were most strongly tied to self-reported improvisation expertise, we think  
676 we found robust evidence in support of the idea that categorization of musical structures is tied to how  
677 large-scale cortical brain networks are engaged and interact, and that improvisers implement these processes  
678 differently compared to classically trained musicians. While we found these effects here in a target detection  
679 task, we argue, supported by literature, that these or similar mechanisms may be employed when musicians  
680 actually improvise on their instrument, may facilitate improvisation as a skill and should be a result of  
681 improvisers' intense and specific training regimen.

## 682 **Acknowledgments**

683 This work was supported in part by the United States Army Research Laboratory under Cooperative  
684 Agreements W911NF-10-2-0022 and W911NF-16-2-0008 as well as a Vannevar Bush Faculty Fellowship from  
685 the US Department of Defense (N00014-20-1-2027) and the Presidential Scholars in Society and Neuroscience  
686 program at Columbia University. Author contributions: J.F., J.M., A.G., Y.L. and P.S. designed research;  
687 J.F., Y.L. and J.M. performed research; J.F. and Y.L. contributed analytic tools; J.F. and Y.L. analyzed  
688 data; J.F., P.S., Y.L., A.G. and J.M. wrote the paper.

## 689 References

- 690 Adhikari, B. M., Norgaard, M., Quinn, K. M., Ampudia, J., Squirek, J., & Dhamala, M. (2016). The brain  
691 network underpinning novel melody creation. *Brain connectivity*, *6*, 772–785.
- 692 Ahrens, M.-M., Veniero, D., Freund, I. M., Harvey, M., & Thut, G. (2019). Both dorsal and ventral attention  
693 network nodes are implicated in exogenously driven visuospatial anticipation. *Cortex*, *117*, 168–181.
- 694 Arden, R., Chavez, R. S., Grazioplene, R., & Jung, R. E. (2010). Neuroimaging creativity: a psychometric  
695 view. *Behavioural brain research*, *214*, 143–156.
- 696 Bashwiler, D., & Bacon, D. (2019). Musical creativity and the motor system. *Current Opinion in Behavioral  
697 Sciences*, *27*, 146–153.
- 698 Bashwiler, D. M., Wertz, C. J., Flores, R. A., & Jung, R. E. (2016). Musical creativity “revealed” in brain  
699 structure: interplay between motor, default mode, and limbic networks. *Scientific reports*, *6*, 20482.
- 700 Beaty, R. E., Benedek, M., Kaufman, S. B., & Silvia, P. J. (2015). Default and executive network coupling  
701 supports creative idea production. *Scientific reports*, *5*, 1–14.
- 702 Beaty, R. E., Chen, Q., Christensen, A. P., Qiu, J., Silvia, P. J., & Schacter, D. L. (2018a). Brain networks of  
703 the imaginative mind: Dynamic functional connectivity of default and cognitive control networks relates  
704 to openness to experience. *Human brain mapping*, *39*, 811–821.
- 705 Beaty, R. E., Christensen, A. P., Benedek, M., Silvia, P. J., & Schacter, D. L. (2017). Creative constraints:  
706 Brain activity and network dynamics underlying semantic interference during idea production. *Neuroim-  
707 age*, *148*, 189–196.
- 708 Beaty, R. E., Kenett, Y. N., Christensen, A. P., Rosenberg, M. D., Benedek, M., Chen, Q., Fink, A., Qiu,  
709 J., Kwapil, T. R., Kane, M. J. et al. (2018b). Robust prediction of individual creative ability from brain  
710 functional connectivity. *Proceedings of the National Academy of Sciences*, *115*, 1087–1092.
- 711 Beaty, R. E., Seli, P., & Schacter, D. L. (2019). Network neuroscience of creative cognition: mapping cognitive  
712 mechanisms and individual differences in the creative brain. *Current opinion in behavioral sciences*, *27*,  
713 22–30.
- 714 Belden, A., Zeng, T., Przynsinda, E., Anteraper, S. A., Whitfield-Gabrieli, S., & Loui, P. (2020). Impro-  
715 vising at rest: Differentiating jazz and classical music training with resting state functional connectivity.  
716 *NeuroImage*, *207*, 116384.
- 717 Benedek, M., Jauk, E., Sommer, M., Arendasy, M., & Neubauer, A. C. (2014). Intelligence, creativity,  
718 and cognitive control: The common and differential involvement of executive functions in intelligence and  
719 creativity. *Intelligence*, *46*, 73–83.

- 720 Bengtsson, S. L., Csíkszentmihályi, M., & Ullén, F. (2007). Cortical regions involved in the generation of  
721 musical structures during improvisation in pianists. *Journal of cognitive neuroscience*, *19*, 830–842.
- 722 Benjamini, Y., & Hochberg, Y. (1995). Controlling the false discovery rate: a practical and powerful approach  
723 to multiple testing. *Journal of the Royal statistical society: series B (Methodological)*, *57*, 289–300.
- 724 Berliner, P. (1994). *Thinking in Jazz: The Infinite Art of Improvisation..* Chicago Press.
- 725 Bianco, V., Berchicci, M., Perri, R., Quinzi, F., & Di Russo, F. (2017). Exercise-related cognitive effects on  
726 sensory-motor control in athletes and drummers compared to non-athletes and other musicians. *Neuro-*  
727 *science*, *360*, 39–47.
- 728 Boasen, J., Takeshita, Y., Kuriki, S., & Yokosawa, K. (2018). Spectral-spatial differentiation of brain activity  
729 during mental imagery of improvisational music performance using meg. *Frontiers in human neuroscience*,  
730 *12*, 156.
- 731 Braun, H.-J. (2008). Creativity: Technology and the arts. *Frankfurt, New York*, .
- 732 Clayton, M. S., Yeung, N., & Kadosh, R. C. (2015). The roles of cortical oscillations in sustained attention.  
733 *Trends in cognitive sciences*, *19*, 188–195.
- 734 Cohen, J. R. (2018). The behavioral and cognitive relevance of time-varying, dynamic changes in functional  
735 connectivity. *NeuroImage*, *180*, 515–525.
- 736 Cohen, J. R., & D’Esposito, M. (2016). The segregation and integration of distinct brain networks and their  
737 relationship to cognition. *Journal of Neuroscience*, *36*, 12083–12094.
- 738 Cole, M. W., & Schneider, W. (2007). The cognitive control network: integrated cortical regions with  
739 dissociable functions. *Neuroimage*, *37*, 343–360.
- 740 Corbetta, M., & Shulman, G. L. (2002). Control of goal-directed and stimulus-driven attention in the brain.  
741 *Nature reviews neuroscience*, *3*, 201–215.
- 742 Delorme, A., & Makeig, S. (2004). EEGLAB: an open source toolbox for analysis of single-trial EEG dynamics  
743 including independent component analysis. *Journal of Neuroscience Methods*, *134*, 9–21. doi:10.1016/j.  
744 *jneumeth*.2003.10.009.
- 745 Desikan, R. S., Ségonne, F., Fischl, B., Quinn, B. T., Dickerson, B. C., Blacker, D., Buckner, R. L., Dale,  
746 A. M., Maguire, R. P., Hyman, B. T. et al. (2006). An automated labeling system for subdividing the  
747 human cerebral cortex on mri scans into gyral based regions of interest. *Neuroimage*, *31*, 968–980.
- 748 Dhakal, K., Norgaard, M., Adhikari, B. M., Yun, K. S., & Dhamala, M. (2019). Higher node activity with  
749 less functional connectivity during musical improvisation. *Brain connectivity*, *9*, 296–309.

- 750 Dietrich, A., & Kanso, R. (2010). A review of eeg, erp, and neuroimaging studies of creativity and insight.  
751 *Psychological bulletin*, *136*, 822.
- 752 Dosenbach, N. U., Visscher, K. M., Palmer, E. D., Miezin, F. M., Wenger, K. K., Kang, H. C., Burgund,  
753 E. D., Grimes, A. L., Schlaggar, B. L., & Petersen, S. E. (2006). A core system for the implementation of  
754 task sets. *Neuron*, *50*, 799–812.
- 755 Evans, A. C., Collins, D. L., Mills, S., Brown, E. D., Kelly, R. L., & Peters, T. M. (1993). 3d statistical  
756 neuroanatomical models from 305 mri volumes. In *1993 IEEE conference record nuclear science symposium  
757 and medical imaging conference* (pp. 1813–1817). IEEE.
- 758 Evans, J. S. B. (2008). Dual-processing accounts of reasoning, judgment, and social cognition. *Annu. Rev.  
759 Psychol.*, *59*, 255–278.
- 760 Evans, J. S. B. T. (2009). How many dual-process theories do we need? one, two, or many? In J. S. B. T.  
761 Evans, & K. Frankish (Eds.), *Two minds: Dual processes and beyond* (pp. 33–54). Oxford University  
762 Press.
- 763 Faber, S. E., & McIntosh, A. R. (2020). Towards a standard model of musical improvisation. *European  
764 Journal of Neuroscience*, *51*, 840–849.
- 765 Faller, J., Vidaurre, C., Solis-Escalante, T., Neuper, C., & Scherer, R. (2012). Autocalibration and re-  
766 current adaptation: Towards a plug and play online ERD-BCI. *IEEE Transactions on Neural Systems  
767 Rehabilitation Engineering*, *20*, 313–319.
- 768 Fink, A., Benedek, M., Grabner, R. H., Staudt, B., & Neubauer, A. C. (2007). Creativity meets neuroscience:  
769 Experimental tasks for the neuroscientific study of creative thinking. *Methods*, *42*, 68–76.
- 770 Fink, A., Koschutnig, K., Hutterer, L., Steiner, E., Benedek, M., Weber, B., Reishofer, G., Papousek, I.,  
771 & Weiss, E. M. (2014). Gray matter density in relation to different facets of verbal creativity. *Brain  
772 Structure and Function*, *219*, 1263–1269.
- 773 Fornito, A., Harrison, B. J., Zalesky, A., & Simons, J. S. (2012). Competitive and cooperative dynamics  
774 of large-scale brain functional networks supporting recollection. *Proceedings of the National Academy of  
775 Sciences*, *109*, 12788–12793.
- 776 García-Cordero, I., Esteves, S., Mikulan, E. P., Hesse, E., Baglivo, F. H., Silva, W., García, M. d. C.,  
777 Vaucheret, E., Ciruolo, C., García, H. S. et al. (2017). Attention, in and out: Scalp-level and intracranial  
778 eeg correlates of interoception and exteroception. *Frontiers in neuroscience*, *11*, 411.
- 779 Goehr, L. (1992). *The Imaginary Museum of Musical Works: An Essay in the Philosophy of Music*. Clarendon  
780 Press.

- 781 Goldman, A., Jackson, T., & Sajda, P. (2020). Improvisation experience predicts how musicians categorize  
782 musical structures. *Psychology of Music*, *48*, 18–34.
- 783 Goldman-Rakic, P. S. (1996). The prefrontal landscape: implications of functional architecture for under-  
784 standing human mentation and the central executive. *Philosophical Transactions of the Royal Society of*  
785 *London. Series B: Biological Sciences*, *351*, 1445–1453.
- 786 Gramfort, A., Papadopoulos, T., Olivi, E., & Clerc, M. (2010). Openmeeg: opensource software for quasistatic  
787 bioelectromagnetics. *Biomedical engineering online*, *9*, 45.
- 788 Griffa, A., & Van den Heuvel, M. P. (2018). Rich-club neurocircuitry: function, evolution, and vulnerability.  
789 *Dialogues in clinical neuroscience*, *20*, 121.
- 790 Haegens, S., Osipova, D., Oostenveld, R., & Jensen, O. (2010). Somatosensory working memory performance  
791 in humans depends on both engagement and disengagement of regions in a distributed network. *Human*  
792 *brain mapping*, *31*, 26–35.
- 793 Hanada, G., Wong, C.-K., Robbins, K., Bigdely-Shamlo, N., Touryan, J., & Mullen, T. R. (2019). Large-scale  
794 analysis of canonical cortical network dynamics across five visual target detection tasks. In *Proceedings of*  
795 *the IEEE International Conference on Systems, Man and Cybernetics, Bari, Italy*.
- 796 Haufe, S., Nikulin, V. V., Müller, K.-R., & Nolte, G. (2013). A critical assessment of connectivity measures  
797 for eeg data: a simulation study. *Neuroimage*, *64*, 120–133.
- 798 Holland, P. W., & Welsch, R. E. (1977). Robust regression using iteratively reweighted least-squares. *Com-*  
799 *munications in Statistics-theory and Methods*, *6*, 813–827.
- 800 Holmes, C. J., Hoge, R., Collins, L., Woods, R., Toga, A. W., & Evans, A. C. (1998). Enhancement of mr  
801 images using registration for signal averaging. *Journal of computer assisted tomography*, *22*, 324–333.
- 802 Janata, P. (2009). The neural architecture of music-evoked autobiographical memories. *Cerebral Cortex*,  
803 *19*, 2579–2594.
- 804 Janata, P., Birk, J. L., Van Horn, J. D., Leman, M., Tillmann, B., & Bharucha, J. J. (2002). The cortical  
805 topography of tonal structures underlying western music. *science*, *298*, 2167–2170.
- 806 Jauk, E., Benedek, M., & Neubauer, A. C. (2012). Tackling creativity at its roots: Evidence for different  
807 patterns of eeg alpha activity related to convergent and divergent modes of task processing. *International*  
808 *Journal of Psychophysiology*, *84*, 219–225.
- 809 Kaas, J. H., & Stepniewska, I. (2016). Evolution of posterior parietal cortex and parietal-frontal networks  
810 for specific actions in primates. *Journal of Comparative Neurology*, *524*, 595–608.

- 811 Kenett, Y. N., Medaglia, J. D., Beaty, R. E., Chen, Q., Betzel, R. F., Thompson-Schill, S. L., & Qiu,  
812 J. (2018). Driving the brain towards creativity and intelligence: A network control theory analysis.  
813 *Neuropsychologia*, *118*, 79–90.
- 814 Kim, K., & Johnson, M. K. (2014). Extended self: spontaneous activation of medial prefrontal cortex by  
815 objects that are ‘mine’. *Social cognitive and affective neuroscience*, *9*, 1006–1012.
- 816 Klimesch, W., Sauseng, P., & Hanslmayr, S. (2007). Eeg alpha oscillations: the inhibition–timing hypothesis.  
817 *Brain research reviews*, *53*, 63–88.
- 818 Kounieher, F., Charron, S., & Koechlin, E. (2009). Motivation and cognitive control in the human prefrontal  
819 cortex. *Nature neuroscience*, *12*, 939–945.
- 820 Kühn, S., Ritter, S. M., Müller, B. C., Van Baaren, R. B., Brass, M., & Dijksterhuis, A. (2014). The  
821 importance of the default mode network in creativity—a structural mri study. *The Journal of Creative*  
822 *Behavior*, *48*, 152–163.
- 823 Kybic, J., Clerc, M., Abboud, T., Faugeras, O., Keriven, R., & Papadopoulo, T. (2005). A common formalism  
824 for the integral formulations of the forward eeg problem. *IEEE transactions on medical imaging*, *24*, 12–28.
- 825 Lewis, G., & Piekut, B. (2016). *The Oxford handbook of critical improvisation studies* volume 1. Oxford  
826 University Press.
- 827 Lezak, M. (1995). Executive functions and motor performance. *In neuropsychological assessment*, (pp.  
828 650–685).
- 829 Limb, C. J., & Braun, A. R. (2008). Neural substrates of spontaneous musical performance: An fmri study  
830 of jazz improvisation. *PLoS one*, *3*, e1679.
- 831 Liu, S., Chow, H. M., Xu, Y., Erkinen, M. G., Swett, K. E., Eagle, M. W., Rizik-Baer, D. A., & Braun,  
832 A. R. (2012). Neural correlates of lyrical improvisation: an fmri study of freestyle rap. *Scientific reports*,  
833 *2*, 834.
- 834 Liu, Z., Zhang, J., Xie, X., Rolls, E. T., Sun, J., Zhang, K., Jiao, Z., Chen, Q., Zhang, J., Qiu, J. et al.  
835 (2018). Neural and genetic determinants of creativity. *Neuroimage*, *174*, 164–176.
- 836 Lopata, J. A., Nowicki, E. A., & Joannisse, M. F. (2017). Creativity as a distinct trainable mental state: an  
837 eeg study of musical improvisation. *Neuropsychologia*, *99*, 246–258.
- 838 Loui, P. (2018). Rapid and flexible creativity in musical improvisation: review and a model. *Ann NY Acad*  
839 *Sci*, *1423*, 138–145.
- 840 Luna, B., Padmanabhan, A., & O’Hearn, K. (2010). What has fmri told us about the development of  
841 cognitive control through adolescence? *Brain and cognition*, *72*, 101–113.

- 842 Lustenberger, C., Boyle, M. R., Foulser, A. A., Mellin, J. M., & Fröhlich, F. (2015). Functional role of  
843 frontal alpha oscillations in creativity. *Cortex*, *67*, 74–82.
- 844 Mahjoory, K., Nikulin, V. V., Botrel, L., Linkenkaer-Hansen, K., Fato, M. M., & Haufe, S. (2017). Consis-  
845 tency of eeg source localization and connectivity estimates. *Neuroimage*, *152*, 590–601.
- 846 Mantini, D., Corbetta, M., Perrucci, M. G., Romani, G. L., & Del Gratta, C. (2009). Large-scale brain  
847 networks account for sustained and transient activity during target detection. *Neuroimage*, *44*, 265–274.
- 848 de Manzano, Ö., & Ullén, F. (2012). Activation and connectivity patterns of the presupplementary and  
849 dorsal premotor areas during free improvisation of melodies and rhythms. *Neuroimage*, *63*, 272–280.
- 850 Marek, S., & Dosenbach, N. U. (2018). The frontoparietal network: function, electrophysiology, and impor-  
851 tance of individual precision mapping. *Dialogues in clinical neuroscience*, *20*, 133.
- 852 Mihaly, C. (1996). *Creativity: Flow and the psychology of discovery and invention*. HarperPerennial.
- 853 Mok, L. W. (2014). The interplay between spontaneous and controlled processing in creative cognition.  
854 *Frontiers in human neuroscience*, *8*, 663.
- 855 Morf, M., Vieira, A., Lee, D. T., & Kailath, T. (1978). Recursive multichannel maximum entropy spectral  
856 estimation. *IEEE Transactions on Geoscience Electronics*, *16*, 85–94.
- 857 Niendam, T. A., Laird, A. R., Ray, K. L., Dean, Y. M., Glahn, D. C., & Carter, C. S. (2012). Meta-analytic  
858 evidence for a superordinate cognitive control network subserving diverse executive functions. *Cognitive,*  
859 *Affective, & Behavioral Neuroscience*, *12*, 241–268.
- 860 Nolte, G., Ziehe, A., Nikulin, V. V., Schlögl, A., Krämer, N., Brismar, T., & Müller, K.-R. (2008). Robustly  
861 estimating the flow direction of information in complex physical systems. *Physical review letters*, *100*,  
862 234101.
- 863 Oostenveld, R., Fries, P., Maris, E., & Schoffelen, J.-M. (2011). Fieldtrip: open source software for advanced  
864 analysis of meg, eeg, and invasive electrophysiological data. *Computational intelligence and neuroscience*,  
865 *2011*.
- 866 Oostenveld, R., & Praamstra, P. (2001). The five percent electrode system for high-resolution eeg and erp  
867 measurements. *Clinical neurophysiology*, *112*, 713–719.
- 868 Pascual-Marqui, R. D., Esslen, M., Kochi, K., Lehmann, D. et al. (2002). Functional imaging with low-  
869 resolution brain electromagnetic tomography (loreta): a review. *Methods and findings in experimental and*  
870 *clinical pharmacology*, *24*, 91–95.
- 871 Pennington, B. F., & Ozonoff, S. (1996). Executive functions and developmental psychopathology. *Journal*  
872 *of child psychology and psychiatry*, *37*, 51–87.

- 873 Pinho, A. L., de Manzano, Ö., Fransson, P., Eriksson, H., & Ullén, F. (2014). Connecting to create:  
874 expertise in musical improvisation is associated with increased functional connectivity between premotor  
875 and prefrontal areas. *Journal of Neuroscience*, *34*, 6156–6163.
- 876 Pinho, A. L., Ullén, F., Castelo-Branco, M., Fransson, P., & de Manzano, Ö. (2015). Addressing a paradox:  
877 dual strategies for creative performance in introspective and extrospective networks. *Cerebral Cortex*, *26*,  
878 3052–3063.
- 879 Przsinda, E., Zeng, T., Maves, K., Arkin, C., & Loui, P. (2017). Jazz musicians reveal role of expectancy  
880 in human creativity. *Brain and cognition*, *119*, 45–53.
- 881 Ravizza, S. M., & Carter, C. S. (2008). Shifting set about task switching: Behavioral and neural evidence  
882 for distinct forms of cognitive flexibility. *Neuropsychologia*, *46*, 2924–2935.
- 883 Rosen, D., Oh, Y., Erickson, B., Zhang, F. Z., Kim, Y. E., & Kounios, J. (2020). Dual-process contributions  
884 to creativity in jazz improvisations: An spm-eeG study. *NeuroImage*, (p. 116632).
- 885 Rosen, D. S., Kim, Y. E., Mirman, D., & Kounios, J. (2017). All you need to do is ask? the exhortation to  
886 be creative improves creative performance more for nonexpert than expert jazz musicians. *Psychology of*  
887 *Aesthetics, Creativity, and the Arts*, *11*, 420.
- 888 Rothmaler, K., Nigbur, R., & Ivanova, G. (2017). New insights into insight: Neurophysiological correlates  
889 of the difference between the intrinsic “aha” and the extrinsic “oh yes” moment. *Neuropsychologia*, *95*,  
890 204–214.
- 891 Sasaki, M., Iversen, J., & Callan, D. E. (2019). Music improvisation is characterized by increase eeg spec-  
892 tral power in prefrontal and perceptual motor cortical sources and can be reliably classified from non-  
893 improvisatory performance. *Frontiers in Human Neuroscience*, *13*.
- 894 Schacter, D. L., & Addis, D. R. (2007). On the constructive episodic simulation of past and future events.  
895 *Behavioral and Brain Sciences*, *30*, 331–332.
- 896 Schwab, D., Benedek, M., Papousek, I., Weiss, E. M., & Fink, A. (2014). The time-course of eeg alpha power  
897 changes in creative ideation. *Frontiers in human neuroscience*, *8*, 310.
- 898 Seeley, W. W. (2019). The salience network: a neural system for perceiving and responding to homeostatic  
899 demands. *Journal of Neuroscience*, *39*, 9878–9882.
- 900 Seeley, W. W., Menon, V., Schatzberg, A. F., Keller, J., Glover, G. H., Kenna, H., Reiss, A. L., & Greicius,  
901 M. D. (2007). Dissociable intrinsic connectivity networks for salience processing and executive control.  
902 *Journal of Neuroscience*, *27*, 2349–2356.



- 903 Shi, L., Sun, J., Xia, Y., Ren, Z., Chen, Q., Wei, D., Yang, W., & Qiu, J. (2018). Large-scale brain network  
904 connectivity underlying creativity in resting-state and task fmri: cooperation between default network and  
905 frontal-parietal network. *Biological psychology*, *135*, 102–111.
- 906 Shulman, G. L., McAvoy, M. P., Cowan, M. C., Astafiev, S. V., Tansy, A. P., d'Avossa, G., & Corbetta,  
907 M. (2003). Quantitative analysis of attention and detection signals during visual search. *Journal of*  
908 *neurophysiology*, *90*, 3384–3397.
- 909 Smith, E. E., & Jonides, J. (1999). Storage and executive processes in the frontal lobes. *Science*, *283*,  
910 1657–1661.
- 911 Sowden, P. T., Pringle, A., & Gabora, L. (2015). The shifting sands of creative thinking: Connections to  
912 dual-process theory. *Thinking & Reasoning*, *21*, 40–60.
- 913 Stanovich, K. E. (1999). *Who is rational?: Studies of individual differences in reasoning*. Psychology Press.
- 914 Sternberg, R. J., Grigorenko, E. L., & Singer, J. L. (2004). *Creativity: From potential to realization..*  
915 American Psychological Association, Washington.
- 916 Stevens Jr, C. E., & Zabelina, D. L. (2019). Creativity comes in waves: an eeg-focused exploration of the  
917 creative brain. *Current Opinion in Behavioral Sciences*, *27*, 154–162.
- 918 Tadel, F., Baillet, S., Mosher, J. C., Pantazis, D., & Leahy, R. M. (2011). Brainstorm: a user-friendly  
919 application for meg/eeg analysis. *Computational intelligence and neuroscience*, *2011*.
- 920 Takeuchi, H., Taki, Y., Nouchi, R., Yokoyama, R., Kotozaki, Y., Nakagawa, S., Sekiguchi, A., Iizuka, K.,  
921 Yamamoto, Y., Hanawa, S. et al. (2017). Creative females have larger white matter structures: evidence  
922 from a large sample study. *Human Brain Mapping*, *38*, 414–430.
- 923 Townsend, J. T., & Ashby, F. G. (1978). Methods of modeling capacity in simple processing systems.  
924 *Cognitive theory*, *3*, 199–139.
- 925 Vidaurre, C., Sander, T. H., & Schlögl, A. (2011). Biosig: the free and open source software library for  
926 biomedical signal processing. *Computational intelligence and neuroscience*, *2011*.
- 927 Von Stein, A., & Sarnthein, J. (2000). Different frequencies for different scales of cortical integration: from  
928 local gamma to long range alpha/theta synchronization. *International journal of psychophysiology*, *38*,  
929 301–313.
- 930 Vossel, S., Geng, J. J., & Fink, G. R. (2014). Dorsal and ventral attention systems: distinct neural circuits  
931 but collaborative roles. *The Neuroscientist*, *20*, 150–159.
- 932 Wagner, A. D., Shannon, B. J., Kahn, I., & Buckner, R. L. (2005). Parietal lobe contributions to episodic  
933 memory retrieval. *Trends in cognitive sciences*, *9*, 445–453.

- 934 Wan, X., Crüts, B., & Jensen, H. J. (2014). The causal inference of cortical neural networks during music  
935 improvisations. *PloS one*, *9*, e112776.
- 936 Ward, W. D. (1999). Absolute pitch. In *The psychology of music* (pp. 265–298). Elsevier.
- 937 Williams, L. M. (2016). Precision psychiatry: a neural circuit taxonomy for depression and anxiety. *The*  
938 *Lancet Psychiatry*, *3*, 472–480.
- 939 Zabelina, D. L., & Ganis, G. (2018). Creativity and cognitive control: Behavioral and erp evidence that diver-  
940 gent thinking, but not real-life creative achievement, relates to better cognitive control. *Neuropsychologia*,  
941 *118*, 20–28.
- 942 Zabelina, D. L., & Robinson, M. D. (2010). Creativity as flexible cognitive control. *Psychology of Aesthetics,*  
943 *Creativity, and the Arts*, *4*, 136.
- 944 Zamm, A., Schlaug, G., Eagleman, D. M., & Loui, P. (2013). Pathways to seeing music: enhanced structural  
945 connectivity in colored-music synesthesia. *Neuroimage*, *74*, 359–366.
